1 ***Drosophila* Kruppel homolog 1 represses lipolysis through interaction with dFOXO**

2 Ping Kang<sup>1</sup>, Kai Chang<sup>1</sup>, Ying Liu<sup>1</sup>, Mark Bouska<sup>1</sup>, Galina Karashchuk<sup>2</sup>, Rachel Thakore<sup>2</sup>,

3 Wenjing Zheng<sup>2</sup>, Stephanie Post<sup>2</sup>, Colin S. Brent<sup>3</sup>, Sheng Li<sup>4</sup>, Marc Tatar<sup>2\*</sup>, Hua Bai<sup>1,2\*</sup>

4

5 <sup>1</sup> Department of Genetics, Development, and Cell Biology, Iowa State University, Ames, IA,  
6 USA.

7 <sup>2</sup> Department of Ecology and Evolutionary Biology, Brown University, Providence, RI, USA.

8 <sup>3</sup> U.S. Department of Agriculture, U.S. Arid Land Agricultural Research Center, Maricopa, AZ,  
9 USA.

10 <sup>4</sup> Key Laboratory of Insect Developmental and Evolutionary Biology, Institute of Plant  
11 Physiology and Ecology, Shanghai Institutes for Biological Sciences, Chinese Academy of  
12 Sciences, Shanghai, China.

13

14 **\* Corresponding Authors:**

15 E-mail: [hbai@iastate.edu](mailto:hbai@iastate.edu) (HB)

16 E-mail: [Marc\\_Tatar@brown.edu](mailto:Marc_Tatar@brown.edu) (MT)

17

18

19

20

21

22

23

24 **Abstract**

25           Transcriptional coordination is a vital process contributing to metabolic homeostasis. As  
26 one of the key nodes in the metabolic network, the forkhead transcription factor FOXO has been  
27 shown to interact with diverse transcription co-factors and integrate signals from multiple  
28 pathways to control metabolism, oxidative stress response, and cell cycle. Recently,  
29 insulin/FOXO signaling has been implicated in the regulation of insect development via the  
30 interaction with insect hormones, such as ecdysone and juvenile hormone. In this study, we  
31 identified an interaction between dFOXO and the zinc finger transcription factor Kruppel  
32 homolog 1 (Kr-h1), one of the key players in juvenile hormone signaling in *Drosophila*. We  
33 found that *Kr-h1* mutants have reduced triglyceride storage, decreased insulin signaling and  
34 delayed larval development. Notably, Kr-h1 physically and genetically interacts with dFOXO *in*  
35 *vitro* and *in vivo* to regulate the transcriptional activation of adipose lipase *brummer (bmm)*. The  
36 transcriptional co-regulation by Kr-h1 and dFOXO may represent a broad mechanism by which  
37 Kruppel-like factors integrate with insulin signaling to maintain metabolic homeostasis and  
38 coordinate organism growth.

39

40

41

42

43

44

45

46

## 47 **Introduction**

48           Metabolic homeostasis plays important roles in developing animals <sup>1,2</sup>. The ability to  
49 coordinate growth and development with nutrient availability is critical for the adaptation to  
50 fluctuating environment. The main hormonal pathway that regulates insect growth and energy  
51 metabolism is insulin/insulin-like growth factor signaling (IIS). Unlike the single insulin, two  
52 insulin-like growth factor (IGF) system in mammals, insects have multiple insulin-like peptides <sup>3</sup>,  
53 <sup>4</sup>. The activation of insulin/insulin-like growth factor signaling stimulates two major kinase  
54 cascades: the PI3K/AKT pathway and MAPK/ERK pathways <sup>5</sup>. In particular the O subclass of  
55 the forkhead transcription factors (FOXO) are substrates of PI3K/AKT. Decreased cellular IIS  
56 leads to de-phosphorylation and nuclear translocation of FOXO and the transcriptional activation  
57 of FOXO target genes <sup>6,7</sup>. Besides IIS, FOXO transcriptional activity is modulated by several  
58 other pathways (e.g. AMPK, JNK and SIRT) through post-translational modification (PTM) that  
59 modulate FOXO binding to DNA or its co-activators <sup>6,7</sup>.

60           FOXO plays a key role in mediating the cross-talk between insulin signaling and other  
61 insect hormones (e.g. juvenile hormone (JH) and ecdysteroids) to coordinate insect growth,  
62 development and metabolic homeostasis <sup>8-10</sup>. Molting hormone ecdysone regulates  
63 developmental timing by inhibiting insulin signaling and promoting the nuclear localization of  
64 *Drosophila* forkhead transcription factor (dFOXO) <sup>8</sup>. During the non-feeding pupation stages of  
65 *Bombyx* silkworm, 20-hydroxyecdysone (20E) induces lipolysis and promotes transcriptional  
66 activation of two adipose lipases via the regulation of FOXO <sup>11</sup>. On the other hand, the link  
67 between JH and insulin signaling was first demonstrated in *Drosophila* where insulin receptor  
68 (InR) mutants were seen to reduced JH biosynthesis <sup>12</sup>. Recent studies on size control further  
69 suggest that JH controls growth rate through *Drosophila* FOXO <sup>10</sup>. Interestingly, JH also

70 regulates lipid metabolism via the interactions with FOXO in Tsetse flies<sup>9</sup>. Across these studies,  
71 it remains unclear how JH interacts with nutrient signaling and whether JH directly acts on  
72 FOXO-mediated transcriptional control.

73 FOXO interacts with a number of transcription factors within the nucleus to activate or  
74 inhibit transcription of target genes<sup>13</sup>. The interactions between FOXO and its binding partners  
75 contribute to the transcriptional specificity of FOXO and pleiotropic functions of insulin/FOXO  
76 signaling. For instance, mouse FOXO1 interacts with PGC-1 $\alpha$  in liver to modulate insulin-  
77 mediated gluconeogenesis<sup>14</sup>; mammalian FOXO1 binds to Smad2/3 in response to TGF-beta  
78 signaling and regulates cell proliferation<sup>15</sup>; mammalian FOXO transcription factors (FOXO3A  
79 and FOXO4) interacts with beta-Catenin of Wnt signaling to modulate cellular oxidative  
80 response<sup>16</sup>. In *Drosophila*, dFOXO interacts with bZIP transcription factor REPTOR of  
81 Mechanistic target of rapamycin (mTOR) signaling to regulate growth and energy homeostasis<sup>17</sup>.  
82 Interestingly, recent studies found that FOXO interacts with Ultraspiracle (Usp), a co-factor of  
83 the ecdysone receptor, to regulate ecdysone biosynthesis and developmental timing in  
84 *Drosophila*<sup>18</sup>. To date, factors of JH signaling have not been identified to directly interact with  
85 FOXO.

86 Kruppel-like homolog 1 (Kr-h1) is a key regulator of insect molting and metamorphosis  
87 and a major effector in JH signaling<sup>19-21</sup>. JH strongly induces the transcription of *Kr-h1* via its  
88 receptor Methoprene-tolerant (Met)<sup>20-22</sup>. During insect development, Kr-h1 functions as a  
89 transcriptional repressor on neurogenesis of mushroom body and photoreceptor maturation<sup>23,24</sup>.  
90 Kr-h1 belongs to Kruppel-like factors (KLFs) protein family, a group of conserved C2H2 type  
91 zinc finger transcription factors. Unlike mammalian KLFs that contain three zinc finger DNA  
92 binding domains, *Drosophila* Kr-h1 has eight zinc finger motifs<sup>25</sup>. KLFs are also closely related

93 to transcription factor Sp1 (specificity protein 1). At least seventeen KLFs are identified in  
94 mammals<sup>26</sup>. Both KLFs and Sp1-like factors recognized GC-rich DNA elements or CACCC-  
95 box in the promoters of target genes<sup>26</sup>. While KLFs and Sp1 can function as both transcription  
96 activator and repressor, the N-terminus of KLFs contains a consensus motif PXDL(S/T) that is  
97 thought to interact with transcriptional co-repressor CtBP (C-terminal binding protein)<sup>27, 28</sup>.  
98 Some KLFs also interact with transcriptional co-activators to enhance transcriptional activities.  
99 For instance, KLF1 is acetylated through its interaction with co-activators p300 and CREB-  
100 binding protein (CBP), which leads to elevated induction of target gene beta-globin<sup>29</sup>.

101 In this study, we identified an interaction between dFOXO and the zinc finger  
102 transcription factor Kr-h1. While characterizing a *Drosophila Kr-h1* mutant, we found that Kr-h1  
103 controls lipid metabolism and insulin signaling. Kr-h1 physically interacts with dFOXO and  
104 represses the transcriptional activation of dFOXO target genes, including insulin receptor (*InR*)  
105 and triglyceride lipase (*bmm* or *brummer*). The present study suggests a mechanism by which  
106 Kruppel-like factor Kr-h1 integrates with insulin/dFOXO signaling to control lipid metabolism  
107 and coordinate organism growth.

108

## 109 **Results**

### 110 ***Kr-h1* mutants delay larval development and have reduced triglyceride.**

111 Here we study the role of *Drosophila* Kruppel-like factor Kr-h1 in larval development  
112 and metabolic control using a P-element insertion line *Kr-h1[7]* (also known as *Kr-h1[k04411]*)  
113<sup>19, 30</sup>. The P-element insertion is located within exon 1 of the *Kr-h1 $\alpha$*  isoform and is reported to  
114 interfere with the transcription of *Kr-h1* isoforms. *Kr-h1[7]* homozygous mutants are partially  
115 viable during embryonic and larval development<sup>30</sup>. We backcrossed this *Kr-h1[7]* allele into a

116 *yw<sup>R</sup>* background for seven generations, producing a line where heterozygotes prolonged  
117 developmental time to pupariation (Fig. 1A), and homozygotes arrest at either second or third  
118 instar larval stage. *Kr-hl* mRNA is largely reduced in homozygous animals based on primers for  
119 the common region of all three isoforms (Fig. 1B). Using a newly generated rabbit anti-Kr-hl  
120 antibody, three major bands were detected in larval samples from wild-type and *Kr-hl[7]*  
121 heterozygotes (Fig. 1C). Each of these bands was significantly reduced in homozygous animals,  
122 although a novel protein band with a distinct molecular weight (around 51 kDa) was observed  
123 (Fig. 1C). The identify of this protein band is unknown, but may correspond to the novel  
124 transcript observed previously by northern blot in *Kr-hl[7]* homozygous mutants<sup>19,30</sup>.

125         Defects in metabolic regulation also occur in the developmentally delayed *Kr-hl* mutants.  
126 Triglycerides and glycogen were measured in *Kr-hl[7]* homozygous larvae at 90 hours after egg  
127 laying (AEL). Among fed animals, triglycerides (TAG) were reduced 2-fold by *Kr-hl* mutation,  
128 while glycogen was similar among genotypes (Fig. 1D & 1E). TAG is a major stored nutrient  
129 mobilized during fasting. Accordingly, fasting reduced TAG stores in both genotypes, but to a  
130 significantly greater extent in *Kr-hl[7]* homozygous larvae (2.9-fold vs 1.4-fold in wild-type)  
131 (Two-way ANOVA, interaction  $p < 0.047$ ). Fasting reduced stored glycogen to the same extent in  
132 both genotypes (Fig. 1D & 1E).

133         In flies, adipose triglyceride lipase brummer (*bmm*) is a key lipase involved in TAG  
134 mobilization<sup>11,31</sup>. While transcripts of *bmm* were somewhat up-regulated by fasting in wildtype  
135 larvae and in fed *Kr-hl[7]* mutants (Fig. 1F), *bmm* expression was dramatically increased in  
136 fasted *Kr-hl[7]* homozygous larvae (4.3-fold vs. 1.8-fold in wildtype) (Two-way ANOVA,  
137 interaction  $p < 0.0196$ ) (Fig. 1F). This result is consistent with the greater TAG mobilization in  
138 fasted *Kr-hl* mutants as shown in Fig. 1D, suggesting that lipase activities might be enhanced in

139 *Kr-h1* mutants, especially upon fasting. In parallel, we found that the expression of a lysosomal  
140 acid lipase *Lip4* was significantly down-regulated by fasting in wildtype and in fed *Kr-h1*  
141 mutants (Fig. 1G). These results suggest that Kr-h1 might specifically target the major adipose  
142 triglyceride lipase *bmm* to regulate TAG mobilization. As well, transcripts of fly perilipin *Lsd-1*  
143 were upregulated in *Kr-h1* mutants and down-regulated in both genotypes upon fasting (Fig. 1H).  
144 Perilipin proteins (PLINs) are a group of lipid droplet-associated proteins that act as protective  
145 coating factors to prevent lipid breakdown by triglyceride lipases<sup>32,33</sup>. Notably, repression of  
146 *Lsd-1* by fasting was significantly enhanced in *Kr-h1* mutants (10.2-fold vs. 2.4-fold in wildtype)  
147 (Two-way ANOVA, interaction  $p < 0.0001$ ). Collectively, these results suggest that Kr-h1 plays  
148 an important role in lipolysis through the transcriptional regulation of triglyceride lipase *bmm*  
149 and lipid droplet-associated protein *Lsd-1*.

#### 150 ***Kr-h1* mutants have reduced insulin signaling**

151 One way Kr-h1 might modulate TAG is through interactions with insulin/IGF signaling.  
152 Insulin/IGF signaling is a metabolic master regulator that controls lipase gene expression through  
153 its downstream transcription factor dFOXO<sup>34</sup>. Here we see that phosphorylation of IIS-regulated  
154 kinase AKT was reduced in *Kr-h1[7]* homozygotes (Fig. 2A). Furthermore, *Kr-h1[7]*  
155 homozygotes had reduced expression of two insulin-like peptides (*dilp2* and *dilp5*), which are  
156 the major DILPs produced from brain neurosecretory cells, known as insulin producing cells  
157 (IPCs) (Fig. 2B & 2C).

158 Reduced insulin signaling is expected to activate forkhead transcription factor dFOXO<sup>6</sup>.  
159 Accordingly, mRNA expression of two key dFOXO target genes, *4ebp* (eukaryotic translation  
160 initiation factor 4E binding protein) and *InR* were significantly induced in *Kr-h1* mutants (Fig.  
161 2D & 2E), and *InR* expression was further increased in fasted *Kr-h1[7]* homozygotes (5.2-fold vs.

162 3.4-fold in wildtype) (Two-way ANOVA, interaction  $p=0.1023$ ) (Fig. 2F). Thus, in *Kr-h1*  
163 mutant larvae, insulin signaling is inhibited and dFOXO is activated.  
164 ***Kr-h1* genetically interacts with *dfoxo* to regulate the transcription of *InR* and *bmm*, and**  
165 **lipid metabolism.**

166 To determine the requirement of dFOXO for Kr-h1-mediated lipid metabolism, we  
167 generated a double mutant by combining *Kr-h1*[7] and *dfoxo*[21]<sup>35</sup>. Interestingly, *dfoxo*[21]  
168 mutants suppressed the elevated *InR* and *bmm* expression found in *Kr-h1*[7] mutants (Fig. 2G &  
169 2H), confirming that these transcription factors co-regulate key metabolic genes. Furthermore,  
170 the reduction of TAG in *Kr-h1*[7] mutants was rescued by *dfoxo*[21]<sup>-/-</sup> (Fig. 2I). Together, these  
171 results reveal a genetic interaction between Kr-h1 and dFOXO in the control of the transcription  
172 of metabolic genes and lipid metabolism.

### 173 **Kr-h1 physically interacts with dFOXO**

174 Kr-h1 and dFOXO may interact directly or indirectly to regulate the expression of *InR*  
175 and *bmm*. To test the possibility of direct interaction, we attempted to co-immunoprecipitated  
176 (Co-IP) Kr-h1 and dFOXO in cultured *Drosophila* cells. We were able to pull down endogenous  
177 dFOXO from nuclear and cytoplasmic extracts using an anti-dFOXO antibody. Interestingly, Kr-  
178 h1 was detected in the protein complex from the nuclear extracts, but not from the cytoplasmic  
179 extracts (Fig. 3A), suggesting that Kr-h1 can form a protein complex with dFOXO in the nuclei.

180 To identify the protein interaction site between these transcriptional factors, we cloned a  
181 series of deletion fragments that contained different protein domains into the Gateway expression  
182 vectors. Both the DNA binding domain and transactivation domain of dFOXO bound to full-length  
183 Kr-h1 proteins (Fig. 3B). On the other hand, the Kr-h1 fragments that contain  
184 transactivation/repression domain (a Q-rich domain) bound to full-length dFOXO proteins, while



185 Kr-h1 fragments with no Q-rich domain showed no binding (Fig. 3C). Therefore, the  
186 transaction/repression domain of Kr-h1 is responsible for the interaction between Kr-h1 and  
187 dFOXO.

188 The direct interaction between dFOXO and Kr-h1 may serve as a mechanism for the  
189 transcriptional repression of dFOXO target genes by Kr-h1. To test this idea, we co-expressed  
190 dFOXO with Kr-h1 (or Kr-h1 Q-rich domain) in Kc167 cells. The mRNA expression of *bmm*  
191 was significantly induced by dFOXO alone, and this induction was blocked by co-expressing  
192 either full-length of Kr-h1 or Q-rich domain (Fig. 3D). Thus, Kr-h1 appears to repress dFOXO  
193 transcriptional activity through direct protein-protein interactions.

194 **Kr-h1 binds to the promoters of *insulin receptor* and *brummer* lipase adjacent to dFOXO**  
195 **binding sites**

196 Kr-h1 and dFOXO physically interact and may thus transcriptionally co-regulate  
197 metabolic genes. It has been previously shown that dFOXO binds to the promoter regions near  
198 transcriptional start sites of *InR* and *bmm*<sup>34,36</sup>, although our recent ChIP-Seq analysis  
199 (unpublished) suggests that dFOXO also strongly bound the promoter region near the 5'-UTR of  
200 *InR* (P1 region as shown in Fig. 4A) that contains a canonical FOXO binding motif  
201 (GTAAATAA). To identify potential Kr-h1 response elements of *InR* and *bmm*, we searched  
202 their promoters using mammalian KLF motifs in the Jaspar database (<http://jaspar.genereg.net>).  
203 Three putative KLF binding sites denoted P1~P3 in each promoter were identified including sites  
204 in 5'-UTR and intronic regions (Fig. 4A & 4B) (Supplementary Table S1). We did not find any  
205 sites corresponding to the *Bombyx* Kr-h1 response element  
206 (GACCTACGCTAACGCTAAATAGAGTTCCGA) reported by Kayukawa et al.<sup>22</sup>

207 Binding of dFOXO and Kr-h1 to these putative sites was determined by CHIP-PCR  
208 analysis in fasted animals. At *InR*, dFOXO binding was strongest in the P1 region located at the  
209 5'-UTR region (Fig. 4C), while Kr-h1 bound most strongly to the P3 regions (Fig. 4D). At *bmm*  
210 lipase, both dFOXO and Kr-h1 bound with highest affinity in the P1 region (Fig. 4E & 4F). The  
211 co-localization of Kr-h1 and dFOXO binding suggests these factors could interact at promoters  
212 to control the transcriptional activation of the key metabolic genes, and *bmm* lipase in particular.

### 213 **Kr-h1 represses dFOXO binding to the promoter of *InR* and *bmm***

214 Kr-h1 may repress dFOXO activity by inhibiting its binding at response elements in *bmm*  
215 and *InR*. We performed a CHIP-PCR to test this possibility using anti-dFOXO antibody and *Kr-*  
216 *h1*[7] mutants. dFOXO binding to the *InR* P1 region was increased from 2.9-fold relative to  
217 negative control (Act5C) in fasted wildtype to 8.95-fold in fasted *Kr-h1* mutants (Two-way  
218 ANOVA, interaction  $p < 0.0001$ ) (Fig. 4G). In contrast, dFOXO binding to the *bmm* P1 region  
219 was slightly but non-significantly increased from 2.1-fold in fasted wildtype to 2.8-fold in fasted  
220 *Kr-h1* mutants (Two-way ANOVA, interaction  $p = 0.5862$ ) (Fig. 4H). At the *InR* promoter in  
221 particular, inhibition of dFOXO-DNA interaction may be one mechanism by which Kr-h1  
222 modulates dFOXO transcriptional activity. Notably, in a reciprocal experiment with anti-Kr-h1  
223 antibody, the binding of Kr-h1 to *InR* and *bmm* promoters was abolished in *dfoxo*[21] mutants  
224 (Fig. 4I & 4J). These data suggest that Kr-h1 may be recruited after dFOXO binds to the  
225 promoters of target genes, and Kr-h1 subsequently modulates the transcriptional activities of  
226 dFOXO through interfering with dFOXO-DNA interactions.

### 227 **Kr-h1 expresses in adipose tissue to control larval development and lipid metabolism**

228 To determine where Kr-h1 and dFOXO interact *in vivo*, we first examined the tissue-  
229 specific expression of Kr-h1 using our anti-Kr-h1 antibodies. Interestingly, Kr-h1 expressed in

230 larval ring gland, especially in corpora allata (CA), the production sites of JH (Fig. 5A). No  
231 expression of Kr-h1 was detected in insulin producing cells (IPCs) (Fig. 5B). Kr-h1 expressed  
232 highly in body wall muscle and midgut muscle (Fig. 5C), and in fasted fat body (Fig. 5D). Upon  
233 fasting, dFOXO is activated by de-phosphorylation and subsequent nuclear translocation<sup>37</sup>.  
234 Nuclear translocation of both dFOXO and Kr-h1 was increased in fasted larval fat body (Fig.  
235 5D). Thus, dFOXO and Kr-h1 may interact in fat body at the genome to co-regulate the  
236 transcriptional activation of target genes.

237 dFOXO expressed in fat body regulates lipid metabolism and Dilp2 production from  
238 brain IPCs<sup>38</sup>. To determine from which tissue Kr-h1 regulates lipid metabolism and larval  
239 development, we knocked down *Kr-h1* message through RNA interference (RNAi) with specific  
240 Gal4 drivers. Knockdown of *Kr-h1* in fat body (*r4-gal4*) and muscle (*Mhc-gal4*) delayed the  
241 pupariation, while knockdown in gut, IPCs and CA showed no effects on larval development  
242 (Fig. 6A). Since fat body is the major site for triglyceride storage in *Drosophila*, we further  
243 examined the role of Kr-h1 in the regulation of lipid metabolism in fat body. Consistently, fat  
244 body-specific knockdown of *Kr-h1* induced *bmm* transcription, while overexpression of *Kr-h1*  
245 repressed it (Fig. 6B). Fat body-expressed *Kr-h1* also increased TAG levels (Fig. 6C). Thus,  
246 adipose-expressed Kr-h1 is essential for larval development and metabolic regulation.

### 247 **Juvenile hormone signaling regulates lipase *bmm* through dFOXO**

248 The interaction between Kr-h1 and dFOXO has the potential to integrate development  
249 and nutrient signaling. Nutrient signaling through FOXO involves insulin, AMPK, SIRT and  
250 JNK in both insect and mammals alike<sup>6, 13</sup>. On the other hand, the upstream regulators of  
251 Kruppel-like factors are poorly characterized in vertebrates, but among insects Kr-h1 is  
252 decisively regulated by JH, a key hormonal signal involved in molting and metamorphosis<sup>20</sup>. In

253 particular, JH induces the transcription of *Kr-h1* via the JH receptor Methoprene-tolerant (Met)<sup>21</sup>,  
254 <sup>39</sup>. In this capacity, recent studies suggest that JH and Met are involved in not only development  
255 programming, but also in metabolic control<sup>9, 40-42</sup>, although how JH affects metabolism is  
256 fundamentally unknown.

257         Given that Kr-h1 and dFOXO functionally interact to control lipid metabolism, we  
258 examined if this feature provides a way for JH to affect metabolic regulation through *bmm*  
259 transcription. Consistent with previous studies<sup>9</sup>, triglyceride levels were reduced in flies where  
260 the corpora allata were genetically removed (CAX) (Fig. 7A). Conversely, wild-type flies  
261 exposed to the JH analog (JHA) methoprene had elevated TAG contents compared to controls  
262 (Fig. 7B). Additionally, *Met* mutations had also down-regulated TAG levels (Fig. 7C) and up-  
263 regulated *bmm* mRNA (Fig. 7D). Met also genetically interacts with dFOXO to regulate the  
264 mRNA expression of *bmm* (Fig. 7D). JH may therefore regulate *bmm* via interaction with  
265 dFOXO. Supporting this prediction, methoprene treatment inhibited the expression of *bmm* in  
266 wildtype flies, but not in *dfoxo[21]* mutants (Fig. 7E). Furthermore, fasting reduced JH titers  
267 about 2-fold in both female and male flies (Fig. 7F). But while it is known that JH positively  
268 regulates Kr-h1 transcription<sup>20, 22</sup>, *Kr-h1* mRNA did not change upon fasting (Fig. 7G). On the  
269 other hand, methoprene treatment was sufficient to induce *Kr-h1* transcription (Fig. 7H). Overall  
270 these results indicate that JH signaling interacts with dFOXO to regulate lipid metabolism and  
271 lipase gene expression, but the specific role of Kr-h1 in this process remains to be elucidated.

272

## 273 **Discussion**

274         Transcriptional coordination is a key process contributing to metabolic homeostasis<sup>43</sup>.  
275 Multiple transcription factors interact at their genomic binding sites to enhance transcriptional

276 specificity and pleiotropic functions of metabolic pathways. As a key node in the metabolic  
277 network, forkhead transcription factor FOXO has been shown to interact with diverse  
278 transcription co-factors and thereby integrate signals to control metabolism and oxidative stress <sup>6</sup>,  
279 <sup>13</sup>. Intriguingly, in recent genomic studies <sup>44-46</sup>, the enriched FOXO binding at specific genes  
280 does not always correlate to elevated transcriptional output, suggesting there exists inhibitory or  
281 inertial mechanisms to repress FOXO when it is already bound to target genes.

282         Here we find that *Drosophila* Kruppel-like factor Kr-h1 acts as a repressor of dFOXO to  
283 modulate induction of two dFOXO target genes, *InR* and *bmm*. Like other FOXO interacting  
284 partners, Kr-h1 physically binds to dFOXO and inhibits the expression of dFOXO targets by  
285 influencing the binding affinity of dFOXO to DNA. The transcriptional activity of FOXO is  
286 typically regulated in two layers. The first and probably most important regulation is through  
287 PTM, including phosphorylation, acetylation and ubiquitination <sup>6</sup>. PTM of FOXO proteins can  
288 affect its subcellular localization (by phosphorylation), DNA binding affinity (by acetylation)  
289 and protein degradation (by ubiquitination). Interestingly, the effects of acetylation on FOXO  
290 factors seem to be quite different from those by acetylation on KLFs. Acetylation of FOXO by  
291 co-factor CBP/p300 weakens the FOXO binding to its DNA targets <sup>47</sup>, while CBP/p300  
292 acetylated KLF1 shows increased transcriptional activation of target gene beta-globin <sup>29</sup>. The  
293 second mechanism for the regulation of FOXO activity is through the interaction between FOXO  
294 and other transcription factors or co-factors. FOXO factors have been shown to interact with  
295 diverse transcription factors (e.g. Smad3/4, PGC-1 $\alpha$ , STAT3) that often potentiate the expression  
296 of FOXO target genes <sup>13</sup>. Kr-h1 identified in our study presents another example for this type of  
297 modulatory regulation, although the interaction between Kr-h1 and dFOXO results in  
298 transcription repression, instead of activation.

299           While we do not fully resolve how Kr-h1 blocks dFOXO activity, it seems that Kr-h1 can  
300 inhibit dFOXO binding to its DNA targets. This result is similar to previous studies showing  
301 reduced FOXO-DNA binding upon interaction with androgen receptor (AR)<sup>48</sup> and with  
302 peroxisome proliferator-activated receptor- $\gamma$  (PPAR $\gamma$ )<sup>49</sup>. Alternatively, Kr-h1 may act by  
303 inhibiting recruitment of dFOXO-coactivators (e.g. SIRT or CBP/p300) or by sequestering these  
304 coactivators away from dFOXO. Kr-h1 may also recruit additional co-repressors (e.g. CtBP or  
305 Sin3-HDAC) to the dFOXO transactivation sites to block the transcriptional activation of target  
306 genes. The N-terminal Q-rich domain of KLFs is crucial for the recruitment of co-repressors  
307 CtBP and Sin3A<sup>50</sup>. In our co-immunoprecipitation assays, the Q-rich domain of Kr-h1 strongly  
308 binds to dFOXO, suggesting Kr-h1 might inhibit dFOXO activity through recruiting co-  
309 repressors. One possible candidate is an Sds3-like gene (CG14220), which was previously found  
310 to co-immunoprecipitate with Kr-h1<sup>51</sup>. Sds3-like gene family proteins can form co-repressor  
311 complex with Sin3A and HDAC to inhibit gene transcription via interactions with sequence-  
312 specific transcription factors<sup>52</sup>.

313           KLFs have well documented roles in cell proliferation, differentiation and apoptosis<sup>50</sup>. A  
314 function for KLFs in lipid metabolism and insulin signaling complements recent studies where  
315 KLFs function in cellular metabolic regulation, such as gluconeogenesis<sup>53,54</sup>. Likewise, KLF15  
316 deletion in mice produces hypoglycemia and impaired amino acid catabolism upon fasting<sup>54</sup>.  
317 Additionally, KLF5 heterozygous mice are resistant to high-fat diet-induced obesity.  
318 SUMOylation modulates the transcriptional activities of KLF5 and its association with  
319 peroxisome proliferator-activated receptor-delta (PPAR-delta) to control the expression of  
320 carnitine-palmitoyl transferase-1b (Cpt1b), uncoupling proteins 2 and 3<sup>55</sup>. Interestingly, KLF4  
321 has recently been identified as a direct target gene of FOXO-mediated transcription during B cell

322 development<sup>56</sup>, suggesting a potential interaction between KLF and FOXO transcriptional  
323 regulatory network.

324 Our CHIP-PCR studies suggest that *Drosophila* KLF Kr-h1 transcriptionally controls  
325 many metabolic genes, including some of the key dFOXO targets (e.g. *InR* and triglyceride  
326 lipase *bmm*). While it is not known whether *Drosophila* Kr-h1 could broadly interact with  
327 dFOXO across the genome, such a genome-wide interaction between mammalian FOXO factors  
328 and KLFs has been suggested by a recent meta-analysis<sup>57</sup>. Because Kr-h1 plays an important  
329 role in morphogenesis during *Drosophila* development<sup>20</sup>, the interplay between Kr-h1 and  
330 dFOXO raises the possibility that Kr-h1 coordinates growth and development through  
331 insulin/dFOXO-mediated metabolic regulation.

332 In insects, Kr-h1 is one of the key effectors of JH signaling, an important hormonal  
333 pathway governing insect molting, metamorphosis and reproduction. Recent studies reveal that  
334 JH also participates in the regulation of carbohydrate and lipid metabolism<sup>9, 40-42, 58</sup>. In Tsetse  
335 flies, JH and insulin co-regulate the expression of TAG lipase and inhibit lipolysis<sup>9</sup>, which is  
336 similar to our observation that TAG metabolism and lipase *brummer* expression are regulated by  
337 JH and its receptor Met. JH signaling genetically interacts with insulin/dFOXO to control larval  
338 growth rate and define final body size<sup>10</sup>. Thus, the transcriptional co-regulation of lipid  
339 metabolism by *Drosophila* Kr-h1 and dFOXO may contribute to a novel mechanism through  
340 which JH interacts with insulin signaling to integrate metabolism and growth during larval  
341 development.

342 Since both Kr-h1 and dFOXO express highly in metabolic tissues (fat body and muscle)  
343 of *Drosophila*, it is likely that the two transcription factors co-regulate many key metabolic  
344 genes in these tissues. On the other hand, these metabolic tissues also contribute significantly to

345 other insect physiology and organismal functions, such as stress resistance and aging that are  
346 tightly regulated by insulin/dFOXO signaling<sup>59</sup> and linked to JH signaling<sup>40</sup>. Therefore, the  
347 interplay between Kr-h1 and dFOXO may contribute to the regulation of these adult  
348 physiological processes. Identifying the key co-factors and downstream events of Kr-h1/dFOXO  
349 transcriptional network may advance our understanding of the integrated regulation by JH and  
350 insulin signaling of metabolic, developmental and aging pathways.

351

## 352 **Materials and Methods**

### 353 **Fly Husbandry and Stocks**

354 Flies were maintained at 25 °C, 40% relative humidity and 12-hour light/dark. Adults  
355 were reared on agar-based diet with 0.8% cornmeal, 10% sugar, and 2.5% yeast (unless  
356 otherwise noted). Fly stocks used in the present study are: *Kr-h1*[7] or *Kr-h1* [*k04411*]<sup>19,30</sup>  
357 (Bloomington # 10381, backcrossed to *yw<sup>R</sup>*), *Kr-h1* RNAi lines (Bloomington # 50685, VDRC  
358 #107935), *Kr-h1* EP line #EP2289<sup>23,60</sup>, UAS-Kr-h1-LacZ<sup>24</sup>, *foxo*[21]<sup>61</sup>, *Met*[1]<sup>62</sup>, *Met*[27]<sup>62</sup>,  
359 *r4-gal4* (Bloomington # 33832), *Mhc-gal4*<sup>63</sup>, *Mex-gal4*<sup>64</sup>, *dilp2-gal4*<sup>65</sup>, *Aug21-gal4*<sup>66</sup>, *S106-*  
360 *GS-gal4*<sup>67</sup>, UAS-GFP.nls (Bloomington # 4775), UAS-mCD8::GFP (Bloomington # 5137).  
361 Double mutants were made by crossing *Kr-h1*[7] or *Met*[27] to *foxo*[21] respectively. Corpus  
362 allatum (CA) ablation flies (named CAX flies) are generated in our laboratory as previously  
363 described<sup>40</sup>. *yw<sup>R</sup>* flies were used as wild-type flies in most of the experiments. For methoprene  
364 treatment, adult flies were exposed for 24~48 hours to various concentrations of methoprene  
365 applied to the side of culture vials.

### 366 **Kr-h1 Antibody and Western Blot**



367 Kr-h1 polyclonal antibody was generated in rabbits against the short peptide sequence  
368 ‘LIEHFKRGDLARHG’ (Covance, Dedham, MA, USA) and affinity purified (Thermo Fisher  
369 Scientific, Waltham, MA, USA). The antibody recognized three major bands in western blots  
370 (Fig. 1C). These bands may be corresponding to the three isoforms of Kr-h1 ( $\alpha$ ,  $\beta$ ,  $\gamma$ ). All  
371 western blots were performed per the following procedures: Fly tissues or cells were  
372 homogenized in RIPA buffer (Thermo Fisher Scientific, Waltham, MA, USA) with protease  
373 inhibitors (Sigma-Aldrich, St Louis, MO, USA). Supernatant was incubated with NuPAGE LDS  
374 loading buffer (Thermo Fisher Scientific, Waltham, MA, USA) at 70 °C for 10 min. About 20  $\mu$ g  
375 of denatured protein was separated on 4~12% Bis-Tris precast gels (Thermo Fisher Scientific,  
376 Waltham, MA, USA) and transferred to PVDF membranes. Following incubation with primary  
377 and secondary antibodies, the blots were visualized with Pierce ECL Western Blotting Substrate  
378 (Thermo Fisher Scientific, Waltham, MA, USA). Other antibodies used in the present study are  
379 Phospho-*Drosophila* Akt antibody (Ser505) (#4054S, Cell Signaling Technology, Danvers, MA,  
380 USA), Akt antibody (#9272S, Cell Signaling Technology).

### 381 **Quantitative RT–PCR**

382 Total RNA was extracted using Trizol reagent (Thermo Fisher Scientific, Waltham, MA,  
383 USA) from 10 ~15 synchronously staged larvae or whole adult flies. DNase-treated total RNA  
384 was quantified and about 500 ng of total RNA was reverse transcribed to cDNA using iScript  
385 cDNA Synthesis Kit (Bio-Rad, Hercules, CA, USA). QPCR was performed with an ABI prism  
386 7300 Sequence Detection System (Thermo Fisher Scientific, Waltham, MA, USA). Three to five  
387 biological replicates were used for each experimental treatment. mRNA abundance of each gene  
388 was normalized to the expression of ribosomal protein L32 (*RpL32* or *rp49*) by the method of  
389 comparative  $C_T$ . Primer sequences are listed in Supplementary Table S1.

### 390 **Pupariation timing analysis**

391 Synchronized eggs were placed on 35 x 10 mm petri dishes containing standard medium  
392 (see above) at 20~30 eggs per dish. The numbers of pupae were recorded 2~3 times every day  
393 around 120 hours AEL till all larvae molt into pupae.

### 394 **Metabolic assays**

395 All metabolic analyses were performed as previously described<sup>67,68</sup>. For TAG assay, 25  
396 staged larvae or six adult flies were collected and homogenized in 1xPBS containing 0.1%  
397 Tween 20 and TAG was quantified using Thermo Scientific™ Triglycerides Reagent (Thermo  
398 Fisher Scientific, Waltham, MA, USA). For glycogen measurement, samples were digested with  
399 amyloglucosidase (Sigma-Aldrich, St Louis, MO, USA) and glucose contents were quantified  
400 using Thermo Scientific™ Glucose Hexokinase Reagents (Thermo Fisher Scientific, Waltham,  
401 MA, USA). The relative level of each metabolite was obtained by normalizing the metabolites to  
402 total protein.

### 403 **Immunoprecipitation and pull-down**

404 All the immunoprecipitation and pull-down experiments were conducted in *Drosophila*  
405 Kc167 cells adapted to serum-free culture medium (*Drosophila* Schneider Medium). Either full-  
406 length (Kr-h1  $\alpha$ -isoform) or partial gene products were cloned into *Drosophila* Gateway Vectors  
407 with N-terminal tags (FLAG and HA) following *Drosophila* Gateway Vectors protocols  
408 (<https://emb.carnegiescience.edu/Drosophila-gateway-vector-collection>). About 1  $\mu$ g of  
409 constructs were transfected to  $2 \times 10^6$  Kc167 cells using Effectene reagent (Qiagen, Hilden,  
410 Germany). Two days after transfection, cells were harvested and lysed in NP-40 lysis buffer  
411 (Thermo Fisher Scientific, Waltham, MA, USA) with proteinase inhibitors (Sigma-Aldrich, St  
412 Louis, MO, USA). To pull-down target proteins, total protein extracts were incubated with

413 proper antibodies and Dynabeads Protein A (Thermo Fisher Scientific, Waltham, MA, USA).  
414 Following pull-down, western blotting was performed to examine protein complex. Antibodies  
415 used in pull-down and western blots include rabbit anti-Kr-h1 and anti-dFOXO produced in our  
416 laboratory, rabbit anti- HA (Covance, Dedham, MA, USA), and mouse anti-FLAG (Sigma-  
417 Aldrich, St Louis, MO, USA). Nuclear extracts for immunoprecipitation were conducted with a  
418 nuclear extraction kit (Active motif, Carlsbad, CA, USA).

### 419 **Immunohistochemistry and imaging**

420 To examine the tissue-specific expression of Kr-h1 and its co-localization with dFOXO,  
421 various larval tissues were dissected from fed or fasted 3<sup>rd</sup> instar larvae (90 hr AEL) (For fasting,  
422 larvae were placed onto wet kimwipe soaked with 1 x PBS for 16 hours). Tissue immunostaining  
423 were performed as previously described <sup>46</sup>, using slowFade mounting solution with DAPI  
424 (Thermo Fisher Scientific, Waltham, MA, USA). Samples were imaged with a Zeiss 510 laser  
425 scanning confocal microscope or an Olympus BX51WI upright epifluorescence microscope  
426 equipped with Hamamatsu Flash 4.0 Plus CMOS Camera. Antibodies used in  
427 immunohistochemistry included: rabbit anti-Kr-h1 (1:200) (this study), anti-dFOXO (1:200) <sup>69</sup>,  
428 anti-GFP (Sigma-Aldrich, St Louis, MO, USA), anti-rabbit IgG-DyLight 488 (1:300) anti-rabbit  
429 IgG-Alexa Fluor 594 (1:300) and anti-Guinea pig IgG-DyLight 488 (1:300) (Jackson  
430 ImmunoResearch, West Grove, PA, USA).

### 431 **Chromatin immunoprecipitation (ChIP)**

432 ChIP was conducted as previously described <sup>46</sup>. About 50 staged larvae were used in each  
433 sample. Flies were homogenized and cross-linked in 1xPBS containing 1% formaldehyde. The  
434 fly nuclear extractions were sonicated using a Branson 450 sonicator to break down the  
435 chromatin. Immunoprecipitation was performed using Dynabeads Protein A and anti-Kr-h1 and

436 anti-dFOXO antibodies. Following the wash with LiCl and TE buffer, the DNA-protein complex  
437 was eluted, reverse cross-linked, digested with Proteinase K and RNase. Kr-h1-bound or  
438 dFOXO-bound DNA fragments were purified and used as templates in qPCR analysis. Binding  
439 enrichment was calculated as the fold change between ChIP DNA vs. input DNA (Chromatin  
440 extracts before immunoprecipitation). The binding to the coding region of Actin (*Act5C*) was  
441 used as negative controls.

#### 442 **Juvenile hormone quantification**

443 For each sample, 197-200 individual flies (7~10-day-old) were placed in 500  $\mu$ l hexane  
444 in a glass vial with a Teflon cap insert and stored at -80 °C prior to analysis. To extract the  
445 hormone, the flies were crushed with a Teflon tissue grinder. The resultant homogenate was  
446 centrifuged at 3500 rpm for 5 min, and the supernatant was removed to clean vial. Extraction  
447 was conducted three times, combining the resultant supernatant from each sample. The gas  
448 chromatography/mass spectrometry (GC-MS) method <sup>70</sup>, as modified <sup>71, 72</sup>, was used to quantify  
449 juvenile hormone (JH). Samples were eluted through aluminum oxide columns successively with  
450 hexane, 10% ethyl ether-hexane and 30% ethyl ether-hexane. Samples were subjected to a  
451 second series of aluminum oxide elutions (30% ethyl ether-hexane then 50% ethyl-acetate-  
452 hexane) after derivatization with methyl-d alcohol (Sigma-Aldrich, St Louis, MO, USA) and  
453 trifluoroacetic acid (Sigma-Aldrich, St Louis, MO, USA). Purified samples were analyzed on an  
454 HP 7890A Series GC (Agilent Technologies, Santa Clara, CA, USA) equipped with a 30 m x  
455 0.25 mm Zebron ZB-WAX column (Phenomenex, Torrance, CA, USA) and coupled to an HP  
456 5975C inert mass selective detector with helium as the carrier gas. MS analysis occurred in the  
457 SIM mode, monitoring at m/z 76 and 225 to ensure specificity for the d3-methoxyhydrin  
458 derivative of JH III. Total abundance was quantified against a standard curve of derivatized JH

459 III and using farnesol (Sigma-Aldrich, St Louis, MO, USA) as an internal standard. The  
460 detection limit is approximately 1 pg.

#### 461 **Statistical analysis**

462 GraphPad Prism 6 (GraphPad Software, La Jolla, CA) was used for statistical analysis.

463 To compare the mean value of treatment groups versus that of control, either student t-test or  
464 one-way ANOVA was performed using Dunnett's test for multiple comparison. The effects of  
465 mutants on starvation responses was analyzed by two-way ANOVA, including Tukey multiple  
466 comparisons test.

467

#### 468 **References**

- 469 1. Tennessen, J.M. & Thummel, C.S. Coordinating growth and maturation - insights from  
470 *Drosophila*. *Curr Biol* **21**, R750-757 (2011).
- 471 2. Leopold, P. & Perrimon, N. *Drosophila* and the genetics of the internal milieu. *Nature* **450**, 186-  
472 188 (2007).
- 473 3. Wu, Q. & Brown, M.R. Signaling and function of insulin-like peptides in insects. *Annual review of*  
474 *entomology* **51**, 1-24 (2006).
- 475 4. Colombani, J., Andersen, D.S. & Leopold, P. Secreted peptide Dilp8 coordinates *Drosophila* tissue  
476 growth with developmental timing. *Science* **336**, 582-585 (2012).
- 477 5. Taniguchi, C.M., Emanuelli, B. & Kahn, C.R. Critical nodes in signalling pathways: insights into  
478 insulin action. *Nature reviews. Molecular cell biology* **7**, 85-96 (2006).
- 479 6. Calnan, D.R. & Brunet, A. The FoxO code. *Oncogene* **27**, 2276-2288 (2008).
- 480 7. Eijkelenboom, A. & Burgering, B.M. FOXOs: signalling integrators for homeostasis maintenance.  
481 *Nature reviews. Molecular cell biology* **14**, 83-97 (2013).
- 482 8. Colombani, J. *et al.* Antagonistic actions of ecdysone and insulins determine final size in  
483 *Drosophila*. *Science* **310**, 667-670 (2005).
- 484 9. Baumann, A.A. *et al.* Juvenile hormone and insulin suppress lipolysis between periods of  
485 lactation during tsetse fly pregnancy. *Mol Cell Endocrinol* **372**, 30-41 (2013).
- 486 10. Mirth, C.K. *et al.* Juvenile hormone regulates body size and perturbs insulin signaling in  
487 *Drosophila*. *Proc Natl Acad Sci U S A* **111**, 7018-7023 (2014).
- 488 11. Hossain, M.S. *et al.* 20-Hydroxyecdysone-induced transcriptional activity of FoxO upregulates  
489 *brummer* and acid lipase-1 and promotes lipolysis in *Bombyx* fat body. *Insect biochemistry and*  
490 *molecular biology* **43**, 829-838 (2013).
- 491 12. Tatar, M. *et al.* A mutant *Drosophila* insulin receptor homolog that extends life-span and impairs  
492 neuroendocrine function. *Science* **292**, 107-110 (2001).
- 493 13. van der Vos, K.E. & Coffey, P.J. FOXO-binding partners: it takes two to tango. *Oncogene* **27**, 2289-  
494 2299 (2008).

- 495 14. Puigserver, P. *et al.* Insulin-regulated hepatic gluconeogenesis through FOXO1-PGC-1alpha  
496 interaction. *Nature* **423**, 550-555 (2003).
- 497 15. Seoane, J., Le, H.V., Shen, L., Anderson, S.A. & Massague, J. Integration of Smad and forkhead  
498 pathways in the control of neuroepithelial and glioblastoma cell proliferation. *Cell* **117**, 211-223  
499 (2004).
- 500 16. Essers, M.A. *et al.* Functional interaction between beta-catenin and FOXO in oxidative stress  
501 signaling. *Science* **308**, 1181-1184 (2005).
- 502 17. Tiebe, M. *et al.* REPTOR and REPTOR-BP Regulate Organismal Metabolism and Transcription  
503 Downstream of TORC1. *Developmental cell* **33**, 272-284 (2015).
- 504 18. Koyama, T., Rodrigues, M.A., Athanasiadis, A., Shingleton, A.W. & Mirth, C.K. Nutritional control  
505 of body size through FoxO-Ultraspiracle mediated ecdysone biosynthesis. *eLife* **3** (2014).
- 506 19. Pecasse, F., Beck, Y., Ruiz, C. & Richards, G. Kruppel-homolog, a stage-specific modulator of the  
507 prepupal ecdysone response, is essential for Drosophila metamorphosis. *Developmental biology*  
508 **221**, 53-67 (2000).
- 509 20. Minakuchi, C., Zhou, X. & Riddiford, L.M. Kruppel homolog 1 (Kr-h1) mediates juvenile hormone  
510 action during metamorphosis of Drosophila melanogaster. *Mech Dev* **125**, 91-105 (2008).
- 511 21. Kayukawa, T. *et al.* Transcriptional regulation of juvenile hormone-mediated induction of  
512 Kruppel homolog 1, a repressor of insect metamorphosis. *Proc Natl Acad Sci U S A* **109**, 11729-  
513 11734 (2012).
- 514 22. Kayukawa, T. *et al.* Kruppel Homolog 1 Inhibits Insect Metamorphosis via Direct Transcriptional  
515 Repression of Broad-Complex, a Pupal Specifier Gene. *J Biol Chem* **291**, 1751-1762 (2016).
- 516 23. Shi, L. *et al.* Roles of Drosophila Kruppel-homolog 1 in neuronal morphogenesis. *Developmental*  
517 *neurobiology* **67**, 1614-1626 (2007).
- 518 24. Fichelson, P., Brigui, A. & Pichaud, F. Orthodenticle and Kruppel homolog 1 regulate Drosophila  
519 photoreceptor maturation. *Proc Natl Acad Sci U S A* **109**, 7893-7898 (2012).
- 520 25. Bieker, J.J. Kruppel-like factors: three fingers in many pies. *J Biol Chem* **276**, 34355-34358 (2001).
- 521 26. Kaczynski, J., Cook, T. & Urrutia, R. Sp1- and Kruppel-like transcription factors. *Genome biology* **4**,  
522 206 (2003).
- 523 27. Turner, J. & Crossley, M. Cloning and characterization of mCtBP2, a co-repressor that associates  
524 with basic Kruppel-like factor and other mammalian transcriptional regulators. *The EMBO*  
525 *journal* **17**, 5129-5140 (1998).
- 526 28. van Vliet, J., Turner, J. & Crossley, M. Human Kruppel-like factor 8: a CACCC-box binding protein  
527 that associates with CtBP and represses transcription. *Nucleic Acids Res* **28**, 1955-1962 (2000).
- 528 29. Zhang, W., Kadam, S., Emerson, B.M. & Bieker, J.J. Site-specific acetylation by p300 or CREB  
529 binding protein regulates erythroid Kruppel-like factor transcriptional activity via its interaction  
530 with the SWI-SNF complex. *Molecular and cellular biology* **21**, 2413-2422 (2001).
- 531 30. Beck, Y., Pecasse, F. & Richards, G. Kruppel-homolog is essential for the coordination of  
532 regulatory gene hierarchies in early Drosophila development. *Developmental biology* **268**, 64-75  
533 (2004).
- 534 31. Gronke, S. *et al.* Brummer lipase is an evolutionary conserved fat storage regulator in Drosophila.  
535 *Cell Metab* **1**, 323-330 (2005).
- 536 32. Bi, J. *et al.* Opposite and redundant roles of the two Drosophila perilipins in lipid mobilization.  
537 *Journal of cell science* **125**, 3568-3577 (2012).
- 538 33. Beller, M. *et al.* PERILIPIN-dependent control of lipid droplet structure and fat storage in  
539 Drosophila. *Cell Metab* **12**, 521-532 (2010).
- 540 34. Wang, B. *et al.* A hormone-dependent module regulating energy balance. *Cell* **145**, 596-606  
541 (2011).

- 542 35. Yamamoto, R. & Tatar, M. Insulin receptor substrate chico acts with the transcription factor  
543 FOXO to extend Drosophila lifespan. *Aging Cell* **10**, 729-732 (2011).
- 544 36. Puig, O., Marr, M.T., Ruhf, M.L. & Tjian, R. Control of cell number by Drosophila FOXO:  
545 downstream and feedback regulation of the insulin receptor pathway. *Genes & development* **17**,  
546 2006-2020 (2003).
- 547 37. Villa-Cuesta, E., Sage, B.T. & Tatar, M. A role for Drosophila dFoxO and dFoxO 5'UTR internal  
548 ribosomal entry sites during fasting. *PLoS One* **5**, e11521 (2010).
- 549 38. Hwangbo, D.S., Gershman, B., Tu, M.P., Palmer, M. & Tatar, M. Drosophila dFOXO controls  
550 lifespan and regulates insulin signalling in brain and fat body. *Nature* **429**, 562-566 (2004).
- 551 39. Minakuchi, C., Namiki, T. & Shinoda, T. Kruppel homolog 1, an early juvenile hormone-response  
552 gene downstream of Methoprene-tolerant, mediates its anti-metamorphic action in the red  
553 flour beetle *Tribolium castaneum*. *Developmental biology* **325**, 341-350 (2009).
- 554 40. Yamamoto, R., Bai, H., Dolezal, A.G., Amdam, G. & Tatar, M. Juvenile hormone regulation of  
555 Drosophila aging. *BMC biology* **11**, 85 (2013).
- 556 41. Hou, Y. *et al.* Temporal Coordination of Carbohydrate Metabolism during Mosquito  
557 Reproduction. *PLoS Genet* **11**, e1005309 (2015).
- 558 42. Xu, J., Sheng, Z. & Palli, S.R. Juvenile hormone and insulin regulate trehalose homeostasis in the  
559 red flour beetle, *Tribolium castaneum*. *PLoS Genet* **9**, e1003535 (2013).
- 560 43. Desvergne, B., Michalik, L. & Wahli, W. Transcriptional regulation of metabolism. *Physiol Rev* **86**,  
561 465-514 (2006).
- 562 44. Webb, A.E. *et al.* FOXO3 shares common targets with ASCL1 genome-wide and inhibits ASCL1-  
563 dependent neurogenesis. *Cell Rep* **4**, 477-491 (2013).
- 564 45. Alic, N. *et al.* Genome-wide dFOXO targets and topology of the transcriptomic response to stress  
565 and insulin signalling. *Molecular systems biology* **7**, 502 (2011).
- 566 46. Bai, H., Kang, P., Hernandez, A.M. & Tatar, M. Activin signaling targeted by insulin/dFOXO  
567 regulates aging and muscle proteostasis in Drosophila. *PLoS Genet* **9**, e1003941 (2013).
- 568 47. van der Heide, L.P. & Smidt, M.P. Regulation of FoxO activity by CBP/p300-mediated acetylation.  
569 *Trends in biochemical sciences* **30**, 81-86 (2005).
- 570 48. Li, P. *et al.* AKT-independent protection of prostate cancer cells from apoptosis mediated  
571 through complex formation between the androgen receptor and FKHR. *Molecular and cellular*  
572 *biology* **23**, 104-118 (2003).
- 573 49. Dowell, P., Otto, T.C., Adi, S. & Lane, M.D. Convergence of peroxisome proliferator-activated  
574 receptor gamma and Foxo1 signaling pathways. *J Biol Chem* **278**, 45485-45491 (2003).
- 575 50. McConnell, B.B. & Yang, V.W. Mammalian Kruppel-like factors in health and diseases. *Physiol*  
576 *Rev* **90**, 1337-1381 (2010).
- 577 51. Rhee, D.Y. *et al.* Transcription factor networks in Drosophila melanogaster. *Cell Rep* **8**, 2031-  
578 2043 (2014).
- 579 52. Alland, L. *et al.* Identification of mammalian Sds3 as an integral component of the Sin3/histone  
580 deacetylase corepressor complex. *Molecular and cellular biology* **22**, 2743-2750 (2002).
- 581 53. Gray, S. *et al.* The Kruppel-like factor KLF15 regulates the insulin-sensitive glucose transporter  
582 GLUT4. *J Biol Chem* **277**, 34322-34328 (2002).
- 583 54. Gray, S. *et al.* Regulation of gluconeogenesis by Kruppel-like factor 15. *Cell Metab* **5**, 305-312  
584 (2007).
- 585 55. Oishi, Y. *et al.* SUMOylation of Kruppel-like transcription factor 5 acts as a molecular switch in  
586 transcriptional programs of lipid metabolism involving PPAR-delta. *Nature medicine* **14**, 656-666  
587 (2008).
- 588 56. Yusuf, I. *et al.* KLF4 is a FOXO target gene that suppresses B cell proliferation. *International*  
589 *immunology* **20**, 671-681 (2008).

- 590 57. Webb, A.E., Kundaje, A. & Brunet, A. Characterization of the direct targets of FOXO transcription  
591 factors throughout evolution. *Aging Cell* (2016).
- 592 58. Sheng, Z., Xu, J., Bai, H., Zhu, F. & Palli, S.R. Juvenile hormone regulates vitellogenin gene  
593 expression through insulin-like peptide signaling pathway in the red flour beetle, *Tribolium*  
594 *castaneum*. *J Biol Chem* **286**, 41924-41936 (2011).
- 595 59. Tatar, M., Bartke, A. & Antebi, A. The endocrine regulation of aging by insulin-like signals.  
596 *Science* **299**, 1346-1351 (2003).
- 597 60. Rorth, P. A modular misexpression screen in *Drosophila* detecting tissue-specific phenotypes.  
598 *Proc Natl Acad Sci U S A* **93**, 12418-12422 (1996).
- 599 61. Min, K.J., Yamamoto, R., Buch, S., Pankratz, M. & Tatar, M. *Drosophila* lifespan control by dietary  
600 restriction independent of insulin-like signaling. *Aging Cell* **7**, 199-206 (2008).
- 601 62. Ashok, M., Turner, C. & Wilson, T.G. Insect juvenile hormone resistance gene homology with the  
602 bHLH-PAS family of transcriptional regulators. *Proc Natl Acad Sci U S A* **95**, 2761-2766 (1998).
- 603 63. Demontis, F. & Perrimon, N. FOXO/4E-BP signaling in *Drosophila* muscles regulates organism-  
604 wide proteostasis during aging. *Cell* **143**, 813-825 (2010).
- 605 64. Phillips, M.D. & Thomas, G.H. Brush border spectrin is required for early endosome recycling in  
606 *Drosophila*. *Journal of cell science* **119**, 1361-1370 (2006).
- 607 65. Rulifson, E.J., Kim, S.K. & Nusse, R. Ablation of insulin-producing neurons in flies: growth and  
608 diabetic phenotypes. *Science* **296**, 1118-1120 (2002).
- 609 66. Liu, Y. *et al.* Juvenile hormone counteracts the bHLH-PAS transcription factors MET and GCE to  
610 prevent caspase-dependent programmed cell death in *Drosophila*. *Development* **136**, 2015-2025  
611 (2009).
- 612 67. Bai, H., Kang, P. & Tatar, M. *Drosophila* insulin-like peptide-6 (*dilp6*) expression from fat body  
613 extends lifespan and represses secretion of *Drosophila* insulin-like peptide-2 from the brain.  
614 *Aging Cell* **11**, 978-985 (2012).
- 615 68. Tennessen, J.M., Barry, W.E., Cox, J. & Thummel, C.S. Methods for studying metabolism in  
616 *Drosophila*. *Methods* **68**, 105-115 (2014).
- 617 69. Nechipurenko, I.V. & Broihier, H.T. FoxO limits microtubule stability and is itself negatively  
618 regulated by microtubule disruption. *J Cell Biol* **196**, 345-362 (2012).
- 619 70. Bergot, F. [Digestive utilization of purified cellulose in the rainbow trout (*Salmo gairdneri*) and  
620 the common carp (*Cyprinus carpio*)]. *Reproduction, nutrition, developpement* **21**, 83-93 (1981).
- 621 71. Srinivasan, A., Ramaswamy, S.B., Ihl Park, Y. & Shu, S. Hemolymph juvenile hormone titers in  
622 pupal and adult stages of southwestern corn borer [*Diatraea grandiosella* (*pyralidae*)] and  
623 relationship with egg development. *Journal of insect physiology* **43**, 719-726 (1997).
- 624 72. Brent, C.S. & Vargo, E.L. Changes in juvenile hormone biosynthetic rate and whole body content  
625 in maturing virgin queens of *Solenopsis invicta*. *Journal of insect physiology* **49**, 967-974 (2003).

626

627

628

629

630

631



632 **Acknowledgements**

633 We thank Bloomington *Drosophila* Stock Center, *Drosophila* Genomics Resource Center, and  
634 Vienna *Drosophila* Resource Center for fly stocks and cDNA clones. We thank Drs. Yannick  
635 Beck, Heather Broihier, Fabio Demontis, Tzumin Lee, Franck Pichaud, Geoff Richards, Eric  
636 Rulifson, Graham H. Thomas, Thomas Wilson for providing fly stocks and reagents. This work  
637 was supported by National Institutes of Health/National Institute on Aging grant R37 AG024360  
638 to MT, R00 AG048016 to H.B.

639 Mention of trade names or commercial products in this publication is solely for the purpose of  
640 providing specific information and does not imply recommendation or endorsement by the U.S.  
641 Department of Agriculture. USDA is an equal opportunity provider and employer.

642 **Author Contributions**

643 Conceived and designed the experiments: MT HB. Performed the experiments: PK KC YL MB  
644 GK RT WZ SP CSB HB. Analyzed the data: PK KC CSB MT HB. Wrote the paper: CSB SL  
645 MT HB. All authors reviewed and approved the final version of this manuscript.

646 **Additional Information**

647 **Competing Interests:** The authors declare that they have no competing interests.

648

649

650

651

652

653 **Figure Legends**

654 **Fig. 1 *Kr-h1* mutants delayed larval development and have reduced triglyceride.** (A). *Kr-*  
655 *h1[7]* heterozygous mutants delayed pupation and homozygotes arrested at early larval stages.  
656 Percentage of pupariation at different developmental time points is shown. Data are represented  
657 as mean  $\pm$  SE of three trials. Student t-test (\*\*  $p < 0.01$ , \*  $p < 0.05$ ). (B). *Kr-h1* transcripts were  
658 significantly down-regulated in *Kr-h1[7]* mutants. Primers targeting common regions among  
659 three isoforms were used in qRT-PCR. Each bar represents mean  $\pm$  SE of three biological  
660 replicates. Statistical significance between wild-type and mutants is assessed by student t-test  
661 (\*\*\*  $p < 0.001$ ). (C). Reduced Kr-h1 protein expression in *Kr-h1[7]* homozygous mutants. Larvae  
662 at 90 hr AEL (after egg laid) were used in western blots. In wild-type larvae, three distinct bands  
663 are found (~84kDa, 64kDa and 48kDa). (D). *Kr-h1* mutant larvae have reduced TAG level. Upon  
664 starvation, TAG mobilization was faster in Kr-h1 mutants than in wild-type larvae. Larvae at 90  
665 hr AEL were fasted for 16 hr in culture vials with wet kimwipe soaked with PBS. Each bar  
666 represents mean  $\pm$  SE of three biological replicates. Statistical significance is assessed by two-  
667 way ANOVA followed by Tukey multiple comparisons test (\*\*\*  $p < 0.001$ , \*\*  $p < 0.01$ , \*  $p < 0.05$ ).  
668 (E). Glycogen contents and the utilization rate were not affected by *Kr-h1* mutation. (F).  
669 Transcripts of TAG lipase *brummer* (*bmm*) were up-regulated by fasting and *Kr-h1* mutation.  
670 The fasting-induced *bmm* expression was further enhanced by *Kr-h1* mutation. (G). Transcripts  
671 of lysosomal acid lipase *lip4* were down-regulated by fasting and by *Kr-h1* mutation. (H).  
672 Fasting-triggered fly perilipin *Lsd-1* repression was significantly enhanced in *Kr-h1* mutants.  
673 Statistical significance is assessed by two-way ANOVA followed by Tukey multiple  
674 comparisons test (\*\*\*  $p < 0.001$ , \*\*  $p < 0.01$ , \*  $p < 0.05$ ).

675 **Fig. 2 *Kr-h1* mutants have reduced insulin signaling.** (A). Phosphorylation of AKT was down-  
676 regulated in *Kr-h1* mutants. Ten 90 hr AEL larvae were lysed in RIPA buffer and ~20 µg of  
677 denatured protein was loaded to SDS-PAGE gels. (B-C). The transcripts of two insulin-like  
678 peptides (*dilp2*, *dilp5*) were down-regulated by *Kr-h1* mutation. (D-E). The mRNA expression of  
679 the key dFOXO targets *4ebp* and *InR* were up-regulated in *Kr-h1* mutants. Each bar represents  
680 mean ± SE of three biological replicates. Statistical significance between wild-type and mutants  
681 is assessed by student t-test (\*\* p<0.01, \* p<0.05). (F). *InR* transcripts is additively regulated by  
682 fasting and *Kr-h1*. Statistical significance is assessed by two-way ANOVA with Tukey multiple  
683 comparisons test (\*\*\* p<0.001, \*\* p<0.01, \* p<0.05). (G). *dfoxo[21]* mutants suppress the  
684 induction of *InR* transcription by *Kr-h1[7]*. (H). *dfoxo[21]* mutants suppress the induction of  
685 *bmm* transcription by *Kr-h1[7]*. Each bar represents mean ± SE of three biological replicates. (I).  
686 *dfoxo[21]* mutants rescue the reduction of TAG levels in *Kr-h1[7]* mutants. Statistical  
687 significance is assessed by one-way ANOVA, followed by Dunnett's multiple comparisons (\*  
688 p<0.05).

689 **Fig. 3 *Kr-h1* physically interacts with dFOXO.** (A). Co-immunoprecipitation of endogenous  
690 dFOXO and *Kr-h1* from Kc167 cell lysates (N: Nuclear extracts; C: Cytoplasmic extracts). Anti-  
691 dFOXO antibodies were used in pull-down. Rabbit IgG served as a negative control. (B). Co-  
692 immunoprecipitation of FLAG-tagged full-length *Kr-h1* and HA-tagged dFOXO fragments.  
693 Anti-FLAG antibodies were used to pull-down. Schematic graph on the right showing the  
694 position of each dFOXO fragment. Both DNA binding domain and transaction domain of  
695 dFOXO are able to bind to *Kr-h1*. (C). Co- immunoprecipitation of FLAG-tagged full-length  
696 dFOXO and HA-tagged *Kr-h1* fragments. Anti-FLAG antibodies were used to pull down *Kr-h1*-  
697 dFOXO complex Schematic graph on the right showing the position of each *Kr-h1* fragment. Q-

698 rich domain shows strong binding to dFOXO. TAD/TRD: Transaction/repression domain. DBD:  
699 DNA binding domain. (D). Expression of either full-length Kr-h1 or Q-rich domain in Kc167  
700 cells blocked dFOXO-induced transcription of *bmm*. Data are represented as mean  $\pm$ SE of three  
701 trials. One-way ANOVA, followed by Dunnett's multiple comparisons (\*  $p < 0.05$ ).

702 **Fig. 4 Kr-h1 binds to the promoter of brummer lipase and insulin receptor adjacent to**  
703 **dFOXO binding sites.**

704 (A). Schematic graph shows insulin receptor (*InR*) locus. P1 region contains a canonical FOXO  
705 binding motif (GTAAATAA), while putative mammalian Kruppel binding sites are found in all  
706 three regions (based on motif search on the Jaspar database, [jaspar.genereg.net](http://jaspar.genereg.net)). (B). Schematic  
707 graph shows brummer lipase (*bmm*) locus. P1, P2 and P3 are corresponding to the target sites  
708 tested in ChIP-PCR analysis. P1 region contains a canonical FOXO binding motif, while putative  
709 mammalian Kruppel binding sites are found in all three regions. (C). ChIP-PCR analysis on  
710 dFOXO binding to *InR* promoter. (D). ChIP-PCR analysis on Kr-h1 binding to *InR* promoter.  
711 Each bar represents mean  $\pm$ SE of three biological replicates. Statistical significance is assessed  
712 by one-way ANOVA. (E). ChIP-PCR analysis on dFOXO binding to *bmm* promoter. (F). ChIP-  
713 PCR analysis on Kr-h1 binding to *bmm* promoter. (G). dFOXO binding to *InR* promoter (P1  
714 region) is enhanced in fasted *Kr-h1* mutants. Interaction is statistically significant,  $p < 0.0001$ . (H).  
715 dFOXO binding to *bmm* promoter (P1 region) is slight enhanced fasted *Kr-h1* mutants.  
716 Interaction is not statistically significant,  $p = 0.5862$ . (I). Kr-h1 binding to *InR* promoter is  
717 abolished in fasted *dfoxo[21]* mutants. (J). Kr-h1 binding to *bmm* promoter is abolished in fasted  
718 *dfoxo[21]* mutants. Each bar represents mean  $\pm$ SE of three biological replicates. Statistical  
719 significance is assessed by one-way ANOVA, followed by Dunnett's multiple comparisons (\*  
720  $p < 0.05$ , ns: not significant).

721 **Fig. 5 Tissue-specific expression pattern of Kr-h1.** (A). Kr-h1 expressed in ring gland of  
722 Aug21-gal4>UAS-GFP.nls larvae. CA is labeled by GFP staining. Scale bar: 20  $\mu$ m. (B). Kr-h1  
723 does not express in IPCs of dilp2-gal4>UAS-mCD8::GFP larvae. A cluster of IPCs is labeled by  
724 GFP staining. Scale bar: 10  $\mu$ m. (C). Kr-h1 expressed in larval body wall muscle and midgut  
725 muscle. Scale bar: 20  $\mu$ m. (D). Nuclear co-localization of Kr-h1 and dFOXO in fat body upon  
726 fasting. Larvae at 90 hr AEL were fasted for 16 hr in culture vials with wet kimwipe soaked with  
727 PBS. Fat body cells were dissected and staining with anti-Kr-h1 and anti-dFOXO antibodies.  
728 Scale bar: 10  $\mu$ m.

729 **Fig. 6 Fat body-expressed Kr-h1 regulates larval development and lipid metabolism.** (A).  
730 Knockdown of *Kr-h1* expression in fat body (*r4-gal4*) and muscle (*Mhc-gal4*) delayed the  
731 pupariation. Knockdown of *Kr-h1* in gut (*Mex-gal4*), IPCs (*dilp2-gal4*) and CA (*Aug21-gal4*)  
732 shows no effects on larval development. The Kr-h1 RNAi line was backcrossed into a *yw<sup>R</sup>*  
733 background for five generations prior to developmental timing experiments. Data are represented  
734 as mean  $\pm$  SE of three trials. Student t-test (\*\*  $p < 0.01$ , \*  $p < 0.05$ ) (B). Fat body-specific  
735 knockdown of *Kr-h1* induced *bmm* transcription, while overexpression of *Kr-h1* in fat body  
736 repressed it. (C). Fat body-specific overexpression of *Kr-h1* increased TAG levels. Data are  
737 represented as mean  $\pm$  SE of three trials. Student t-test or one-way ANOVA (\*  $p < 0.05$ ).

738 **Fig. 7 Juvenile hormone signaling regulates TAG lipase *bmm* through dFOXO.** (A). TAG  
739 levels are reduced in CA ablation (CAX) flies. Each bar represents mean  $\pm$  SE of three biological  
740 replicates. Student t-test (\*  $p < 0.05$ ). (B) Flies exposed to JH analog (JHA) methoprene show  
741 increased TAG levels. Each bar represents mean  $\pm$  SE of three biological replicates. One-way  
742 ANOVA (\*  $p < 0.05$ ). (C). *Met* mutants have reduced TAG levels. Student t-test (\*  $p < 0.05$ ). (D).  
743 Genetic interaction between *Met* and *dfoxo* in the regulation of *bmm* transcripts. *bmm*

744 transcription is up-regulated in *Met* mutants, which was rescued by *dfoxo<sup>21</sup>* mutants. One-way  
745 ANOVA (\* p<0.05, ns: not significant). (E). JH analog (JHA) methoprene treatment led to  
746 reduced *bmm* expression in wildtype female flies, but not in *dfoxo<sup>21</sup>* mutant flies. Each bar  
747 represents mean  $\pm$ SE of three biological replicates. Statistical significance is assessed by two-  
748 way ANOVA (\* p<0.05, ns: not significant) (F). JH titer is decreased upon fasting. 10-day-old  
749 adult flies were fasted (in culture vial with wet kimwipe soaked with PBS) for 16 hours before  
750 collected for JH quantification. Each bar represents mean  $\pm$ SE of 5~7 biological replicates.  
751 Statistical significance is assessed by student t-test (\* p<0.05). (G). The mRNA expression of  
752 *Kr-h1* did not change upon fasting. (H). Methoprene treatment induced *Kr-h1* transcription. Each  
753 bar represents mean  $\pm$ SE of three biological replicates. One-way ANOVA (\* p<0.05, ns: not  
754 significant).

Figure 1

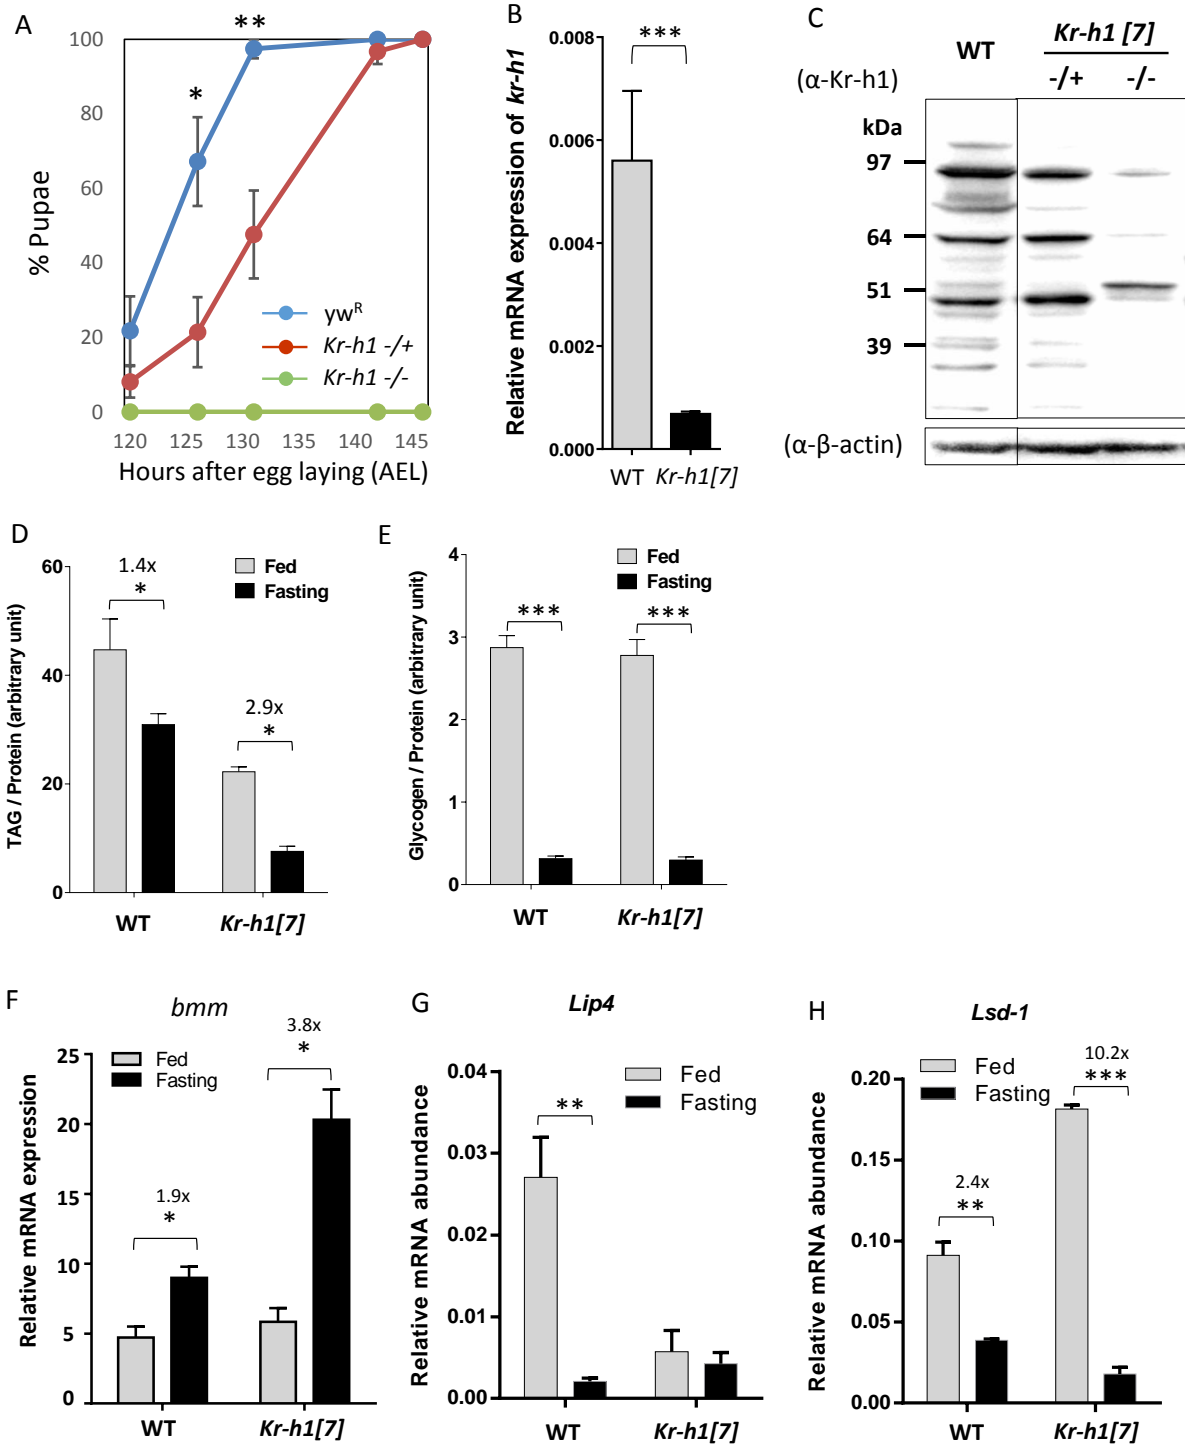

Figure 2

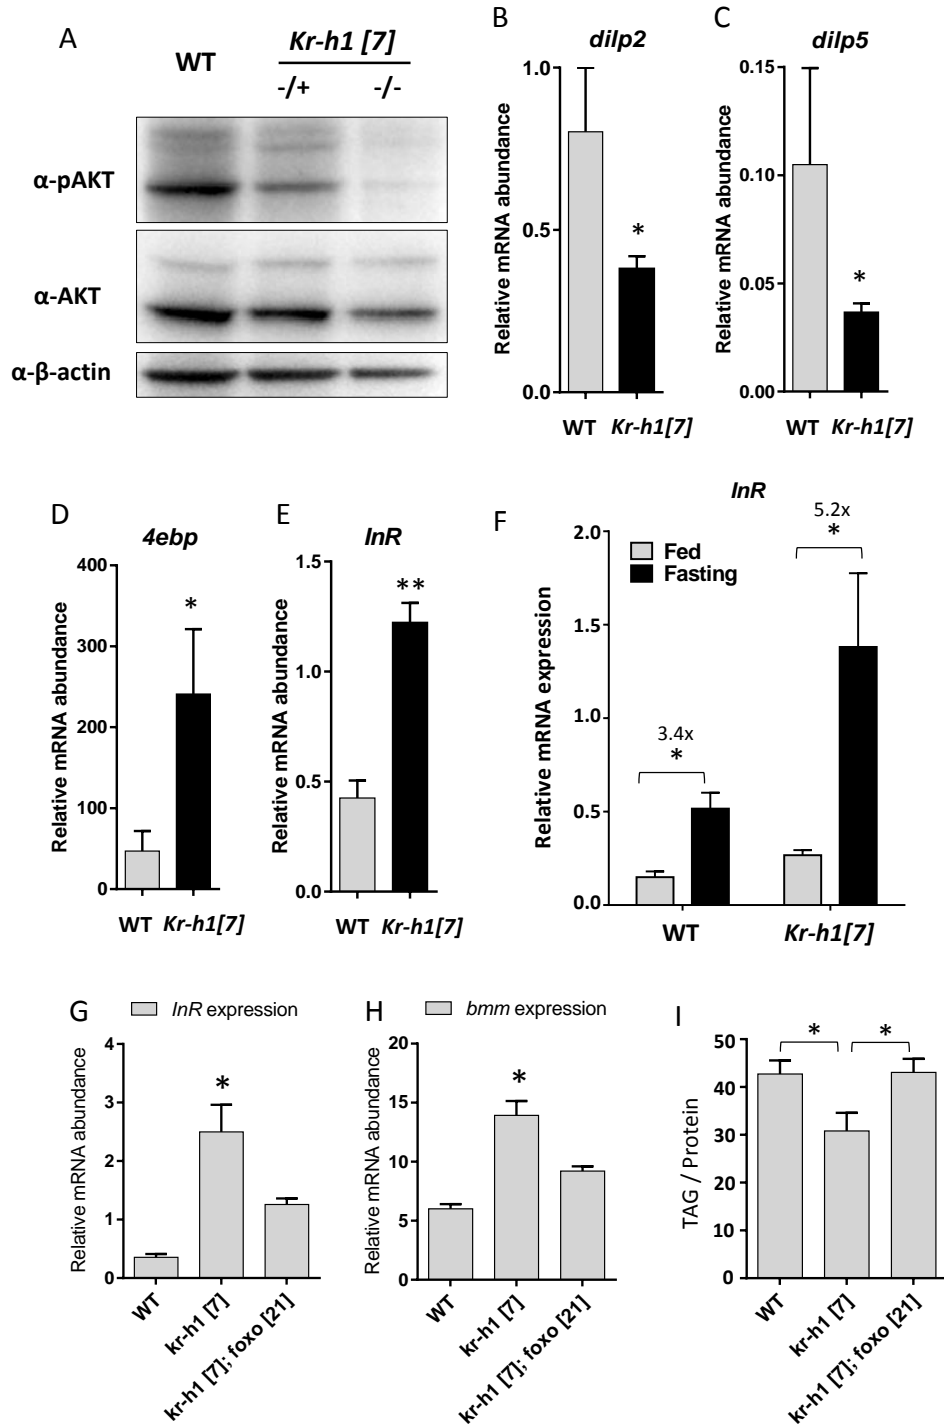



Figure 3

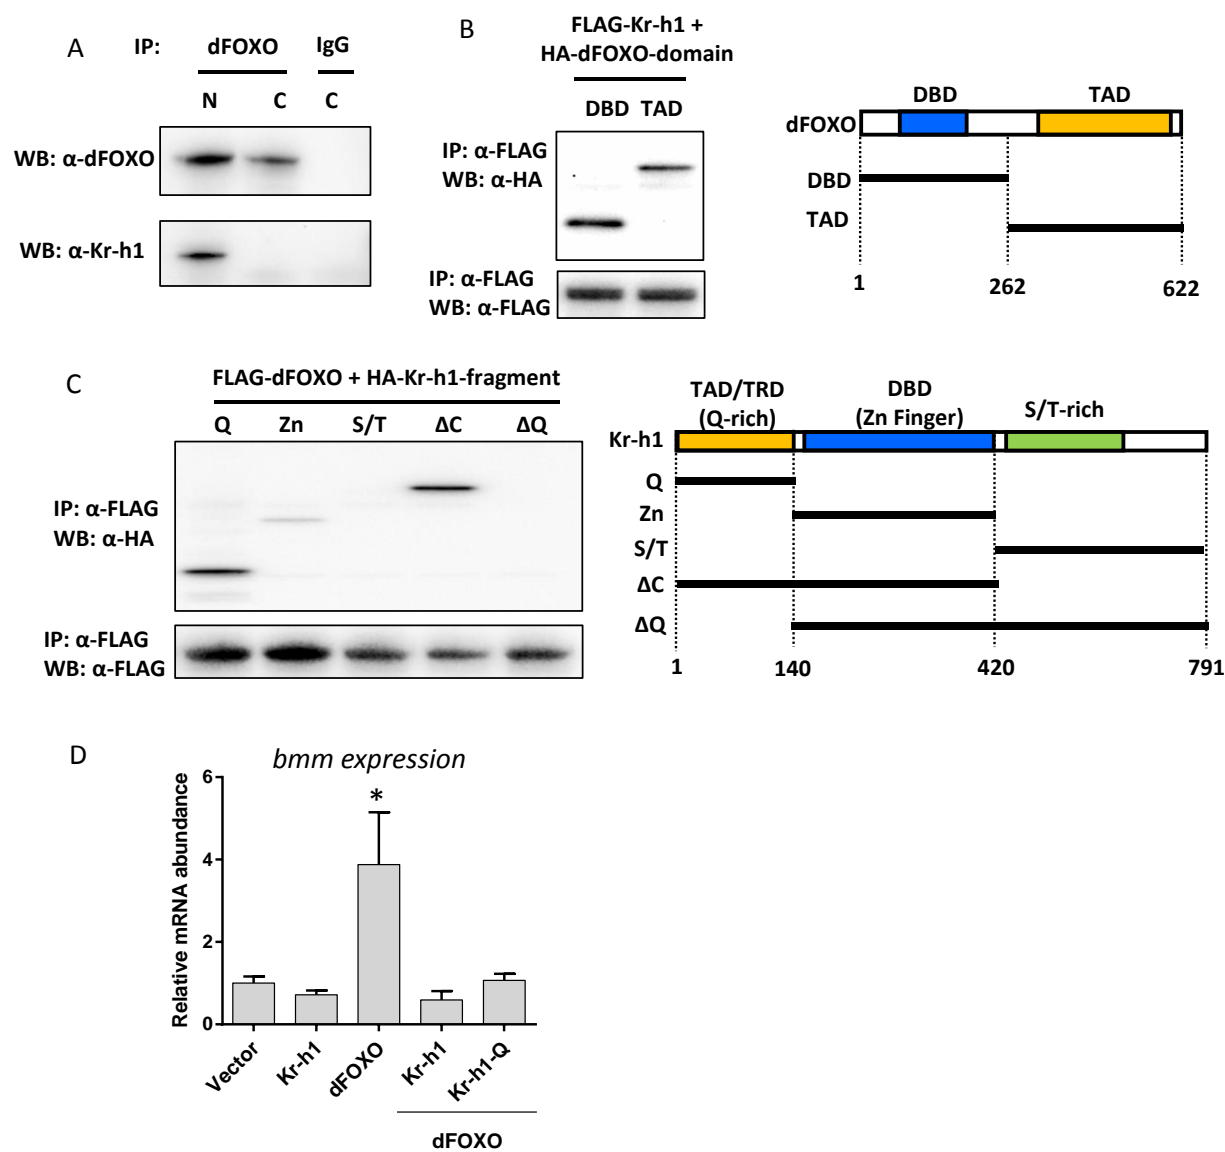

Figure 4

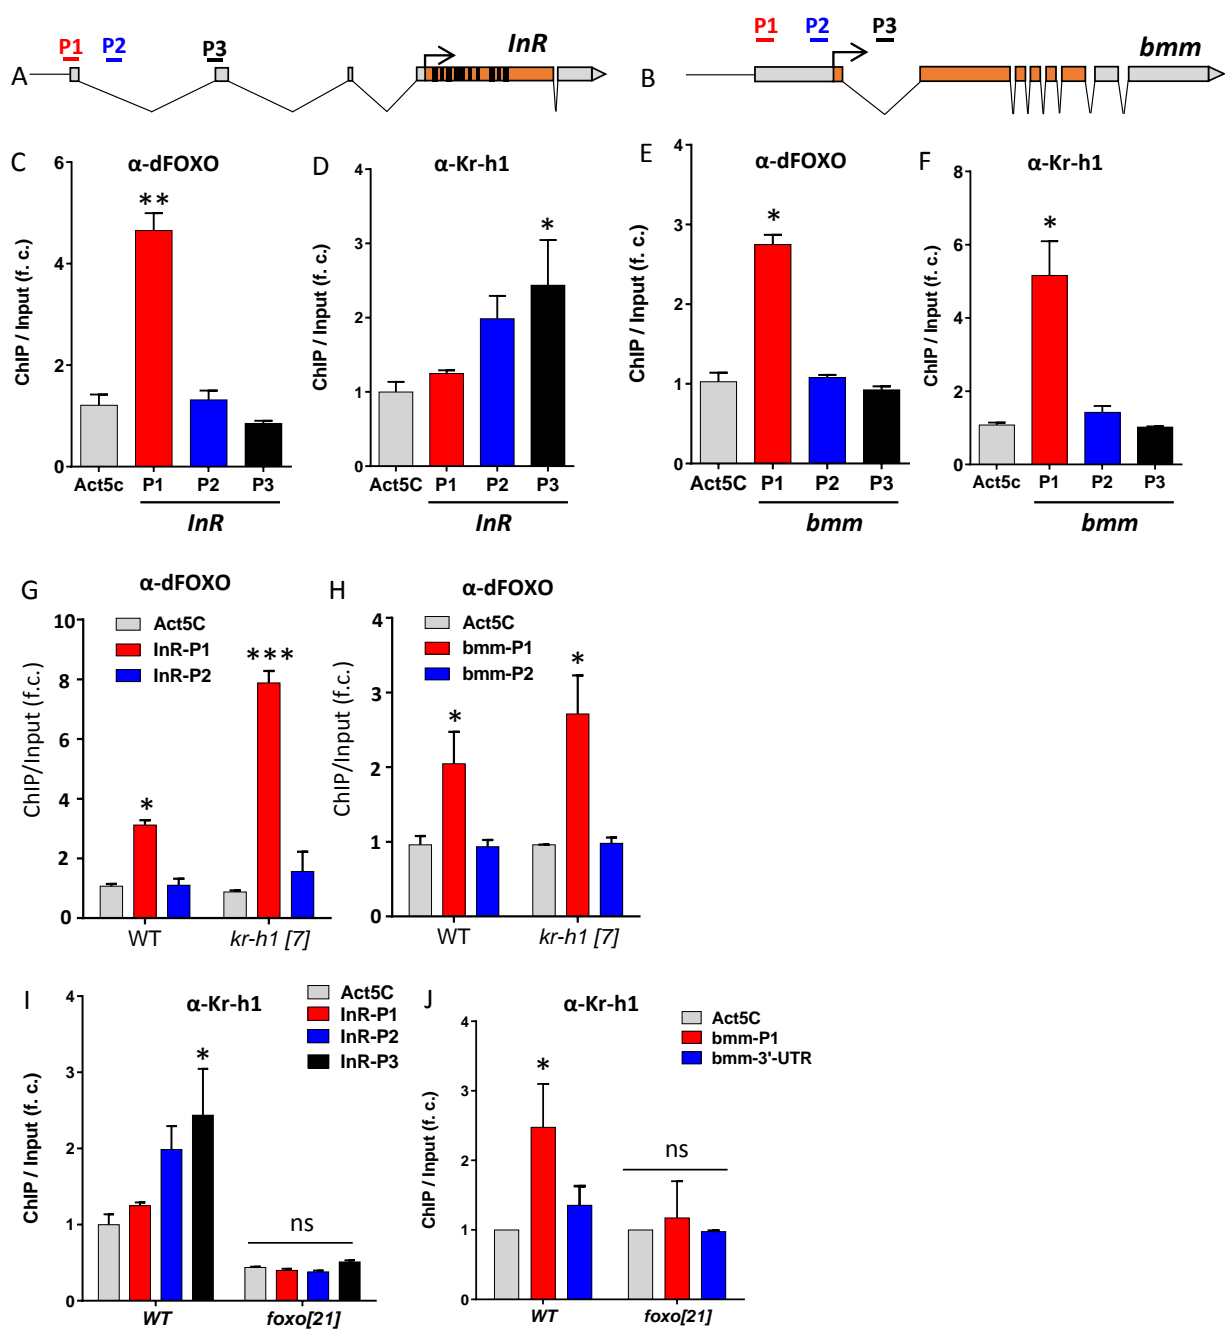

Figure 5

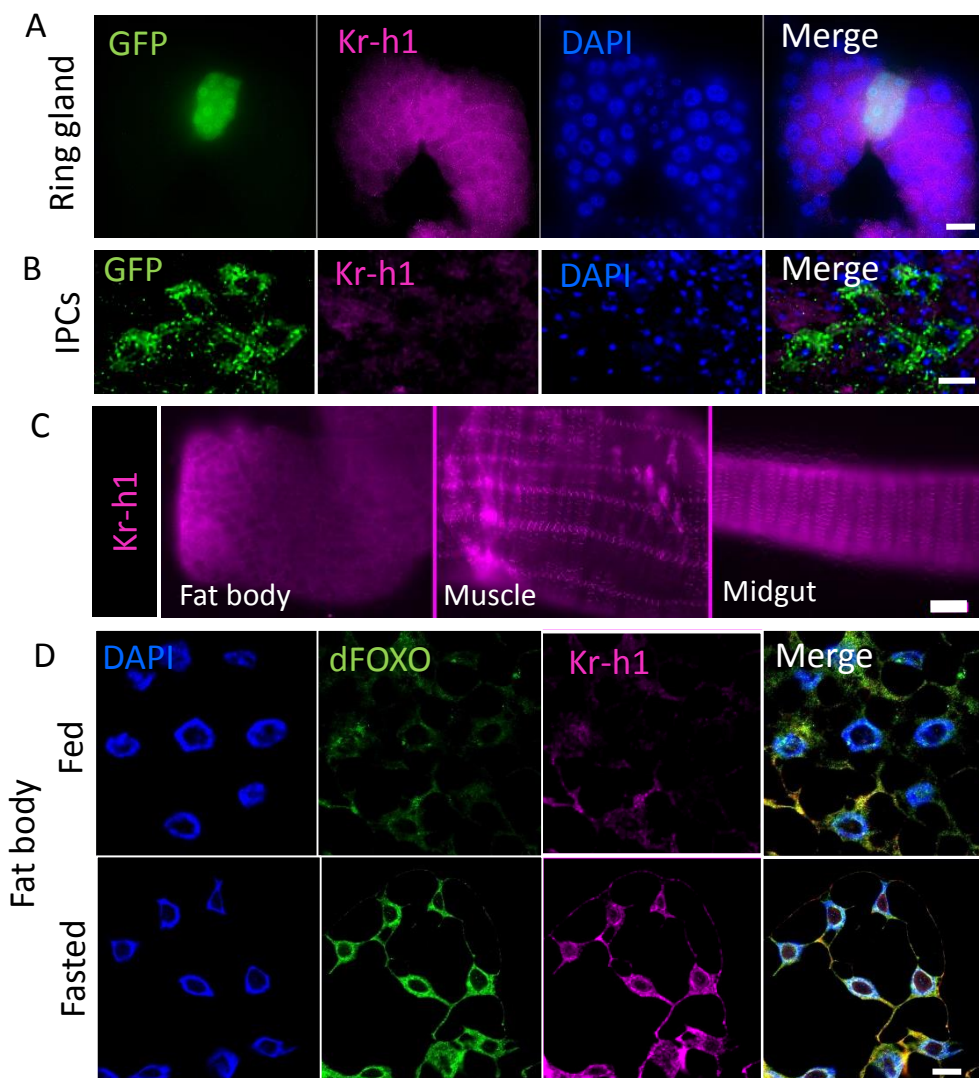

Figure 6

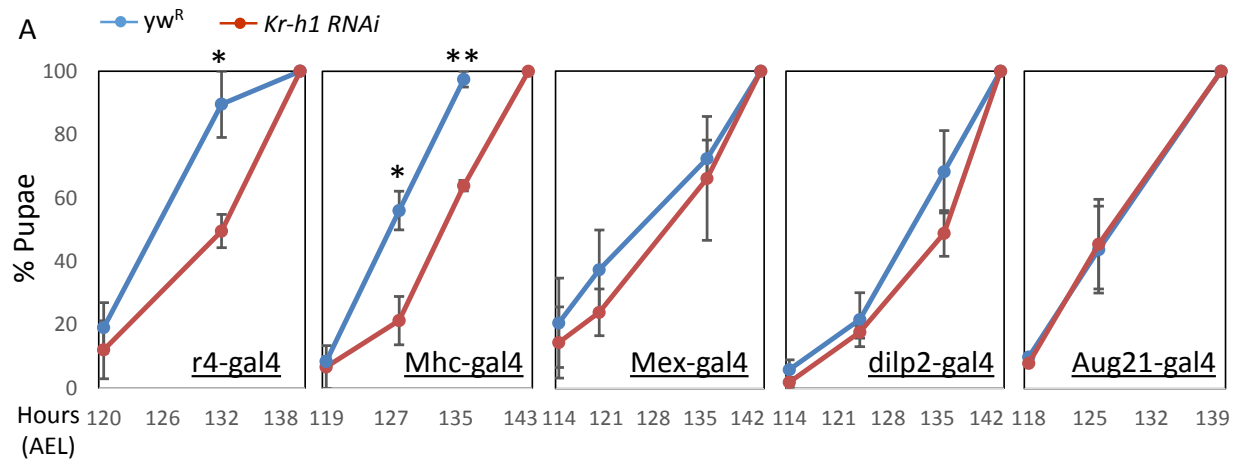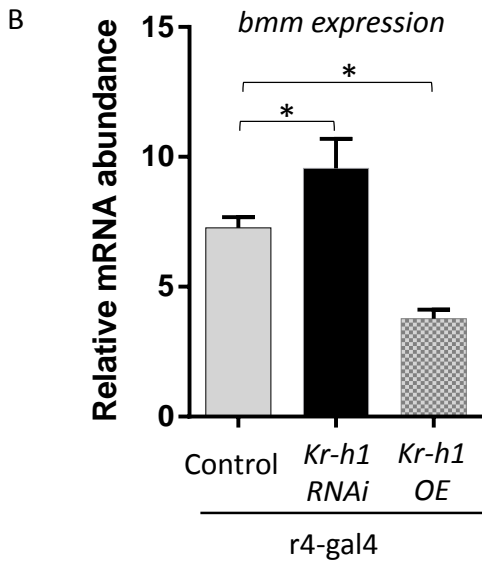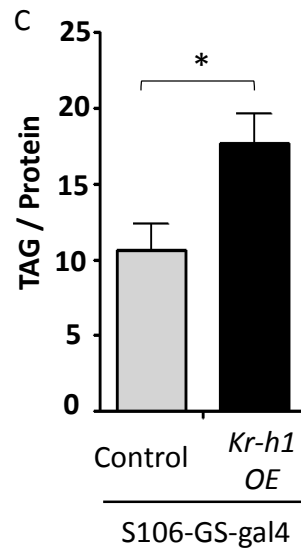

Figure 7

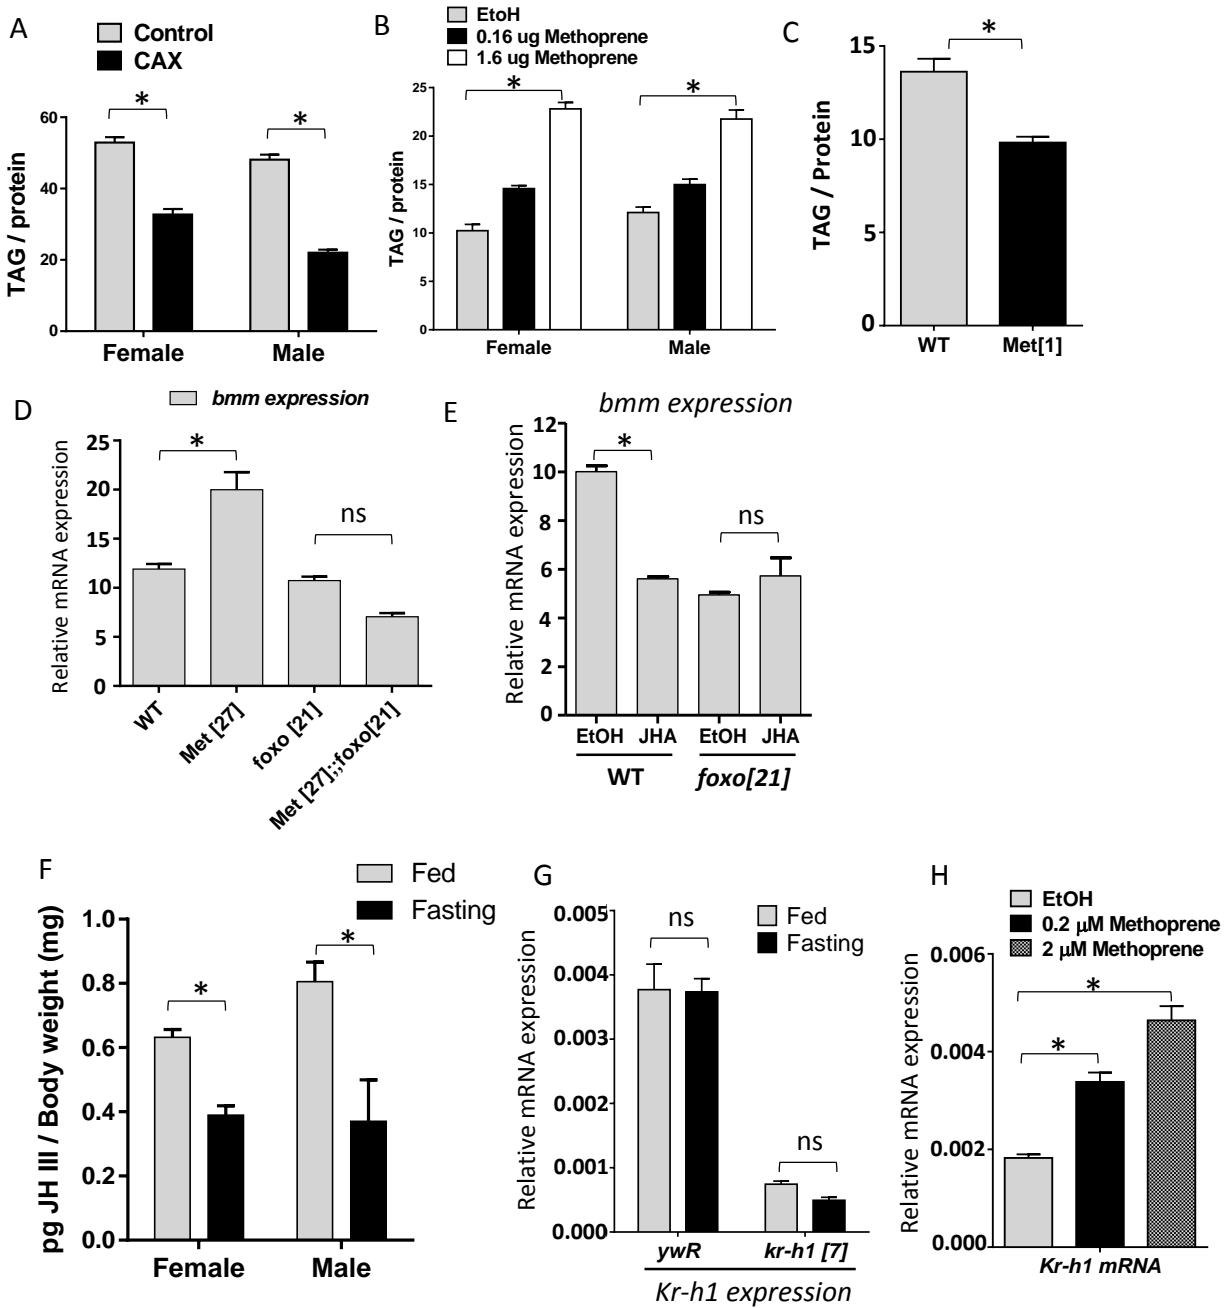

## Supplementary Information

### ***Drosophila* Kruppel homolog 1 represses lipolysis through interaction with dFOXO**

Ping Kang <sup>1</sup>, Kai Chang <sup>1</sup>, Ying Liu <sup>1</sup>, Mark Bouska <sup>1</sup>, Galina Karashchuk <sup>2</sup>, Rachel Thakore <sup>2</sup>, Wenjing Zheng <sup>2</sup>, Stephanie Post <sup>2</sup>, Colin S. Brent <sup>3</sup>, Sheng Li <sup>4</sup>, Marc Tatar <sup>2\*</sup>, Hua Bai <sup>1, 2\*</sup>

Supplementary Table S1. Putative KLF binding sites in the promoters of *InR* and *bmm*.

Supplementary Table S2. List of Primers

Supplementary figure S1. Original full-length blots for Figure 1C

Supplementary figure S2. Original full-length blots for Figure 2A

Supplementary figure S3. Original full-length blots for Figure 3A

Supplementary figure S4. Original full-length blots for Figure 3B

Supplementary figure S5. Original full-length blots for Figure 3C

**Supplementary Table S1. Putative KLF binding sites in the promoters of InR and bmm.**

| <b>Brummer promoter</b> |                   |              |                       |                                |              |            |
|-------------------------|-------------------|--------------|-----------------------|--------------------------------|--------------|------------|
| <b>Model ID</b>         | <b>Model name</b> | <b>Score</b> | <b>Relative score</b> | <b>Predicted site sequence</b> | <b>Start</b> | <b>End</b> |
| MA0599.1                | KLF5              | 10.999       | 0.943175564           | cccactccca                     | 14778617     | 14778626   |
| MA0599.1                | KLF5              | 8.222        | 0.907848237           | ctcactccca                     | 14778639     | 14778648   |
| MA0493.1                | Klf1              | 12.451       | 0.922097346           | agaccaccca                     | 14778983     | 14778993   |
| MA0039.2                | Klf4              | 11.870       | 0.938178771           | tgggtgggtc                     | 14778984     | 14778993   |
| MA0039.2                | Klf4              | 11.760       | 0.936309891           | ggggagtggc                     | 14774266     | 14774275   |
| MA0599.1                | KLF5              | 13.400       | 0.973719645           | gccactcccc                     | 14774266     | 14774275   |
| MA0741.1                | KLF16             | 13.178       | 0.933335628           | cacacacccc                     | 14774348     | 14774358   |
|                         |                   |              |                       |                                |              |            |
| <b>InR promoter</b>     |                   |              |                       |                                |              |            |
| <b>Model ID</b>         | <b>Model name</b> | <b>Score</b> | <b>Relative score</b> | <b>Predicted site sequence</b> | <b>Start</b> | <b>End</b> |
| MA0599.1                | KLF5              | 10.517       | 0.93704385            | gtactcccc                      | 17428300     | 17428309   |
| MA0493.1                | Klf1              | 11.370       | 0.903823178           | agcccctcca                     | 17429438     | 17429448   |
| MA0039.2                | Klf4              | 12.632       | 0.951125009           | tgggaggggc                     | 17429439     | 17429448   |
| MA0741.1                | KLF16             | 15.852       | 0.977047928           | gccacgcccac                    | 17441804     | 17441814   |
| MA0493.1                | Klf1              | 14.076       | 0.949567765           | tgccacgcca                     | 17441805     | 17441815   |
| MA0039.2                | Klf4              | 15.263       | 0.99582521            | tgggcgtggc                     | 17441805     | 17441814   |
| MA0599.1                | KLF5              | 13.501       | 0.975004507           | gccacgcca                      | 17441805     | 17441814   |
| MA0599.1                | KLF5              | 10.638       | 0.938583139           | ttcccgcca                      | 17442990     | 17442999   |
| MA0493.1                | Klf1              | 11.163       | 0.900323869           | agatacaccca                    | 17443145     | 17443155   |
| MA0599.1                | KLF5              | 8.711        | 0.914069002           | tccccgcta                      | 17445459     | 17445468   |

**Supplementary Table S2. List of Primers**

| <b>Name</b>       | <b>Directions</b> | <b>Sequence 5'→3'</b>       | <b>Assays</b> |
|-------------------|-------------------|-----------------------------|---------------|
| <i>Kr-h1</i>      | Forward           | TCA CAC ATC AAG AAG CCA ACT | qRT-PCR       |
|                   | Reverse           | GCTGGT TGG CGG AAT AGT AA   |               |
| <i>bmm</i>        | Forward           | GGCTACAATCATGTGCTGAAAC      | qRT-PCR       |
|                   | Reverse           | CCTCCATCTCCTTCTTGTCTT       |               |
| <i>Lip4</i>       | Forward           | ATAGCACCCACCATGCCAAGTT      | qRT-PCR       |
|                   | Reverse           | AATTGGCTTACGCCCGTGGAAT      |               |
| <i>Lsd-1</i>      | Forward           | CAAGGAGTACATGTCCGATCAC      | qRT-PCR       |
|                   | Reverse           | CGGCTGCATAAGTGGTAAGT        |               |
| <i>dilp2</i>      | Forward           | TCATCTCGATGGTGGCCGTGATTT    | qRT-PCR       |
|                   | Reverse           | ACACCATACTCAGCACCTCGTTGA    |               |
| <i>dilp5</i>      | Forward           | GGTTGCCTGTCCCAATGGATTCAA    | qRT-PCR       |
|                   | Reverse           | TATCCAAATCCGCCAAGTGGTCCT    |               |
| <i>InR</i>        | Forward           | TAT CCA AGA GTC CCG CAA AG  | qRT-PCR       |
|                   | Reverse           | GGT CGT CGC TGT TAGTGG AG   |               |
| <i>4ebp</i>       | Forward           | CCATGATCACCAGGAAGGTTGTCA    | qRT-PCR       |
|                   | Reverse           | AGCCCGCTCGTAGATAAGTTTGGT    |               |
| <i>Act5C</i>      | Forward           | TCGCGATTTGACCGACTACCTGAT    | ChIP-PCR      |
|                   | Reverse           | TGATGTCACGGACGATTCACGCT     |               |
| <i>InR-P1</i>     | Forward           | TGTGTGTGTGTATGTGTGTGTA      | ChIP-PCR      |
|                   | Reverse           | TACAAGTGCGGGCGATTC          |               |
| <i>InR-P2</i>     | Forward           | TCTCCATTCCTGGTCCCATTA       | ChIP-PCR      |
|                   | Reverse           | CTGCTTGGCCTTGAACCTAGA       |               |
| <i>InR-P3</i>     | Forward           | CAACTCGAACTTGCAACAAAGTA     | ChIP-PCR      |
|                   | Reverse           | GTGGATTAAAGTGGCACGAATG      |               |
| <i>bmm-P1</i>     | Forward           | CACCGCGCCGCAATGAATGTATAA    | ChIP-PCR      |
|                   | Reverse           | TTCAATCACTGTTTGTCTGGTCTGGC  |               |
| <i>bmm-P2</i>     | Forward           | AAGGAGCTGCAACGACTAAA        | ChIP-PCR      |
|                   | Reverse           | CTTTGGACTCGGCGTTAGAT        |               |
| <i>bmm-P3</i>     | Forward           | AAATTGCAGCTGCCACAGTTCGTG    | ChIP-PCR      |
|                   | Reverse           | TGCCATGAATTCTCCTCACTTGGC    |               |
| <i>bmm-3'-UTR</i> | Forward           | AAACATCAGCGCCACAATTCTCCC    | ChIP-PCR      |
|                   | Reverse           | ATATACATGTCGCTGCTGTGCGTG    |               |



### Supplementary figure S1. Original full-length blots for Figure 1C

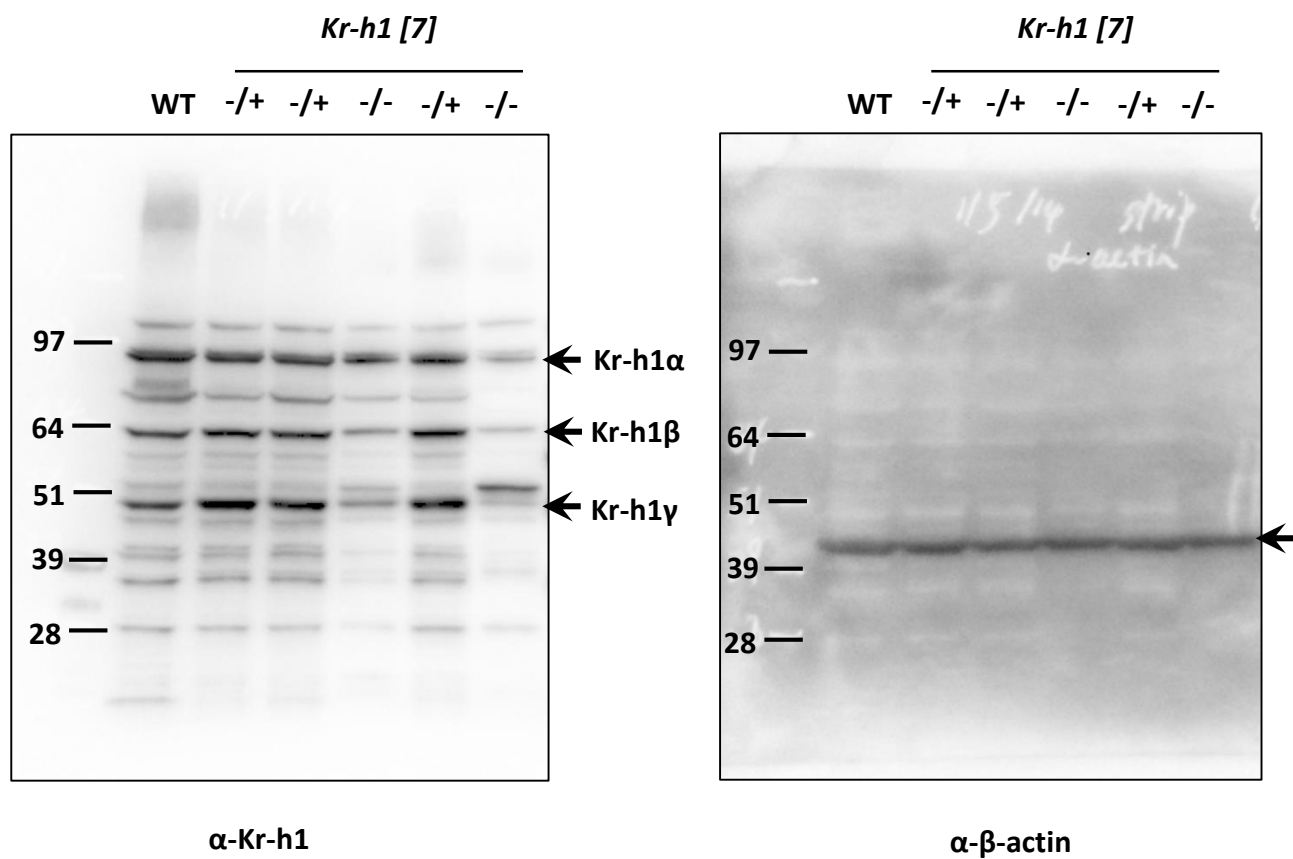

### Supplementary figure S2. Original full-length blots for Figure 2A

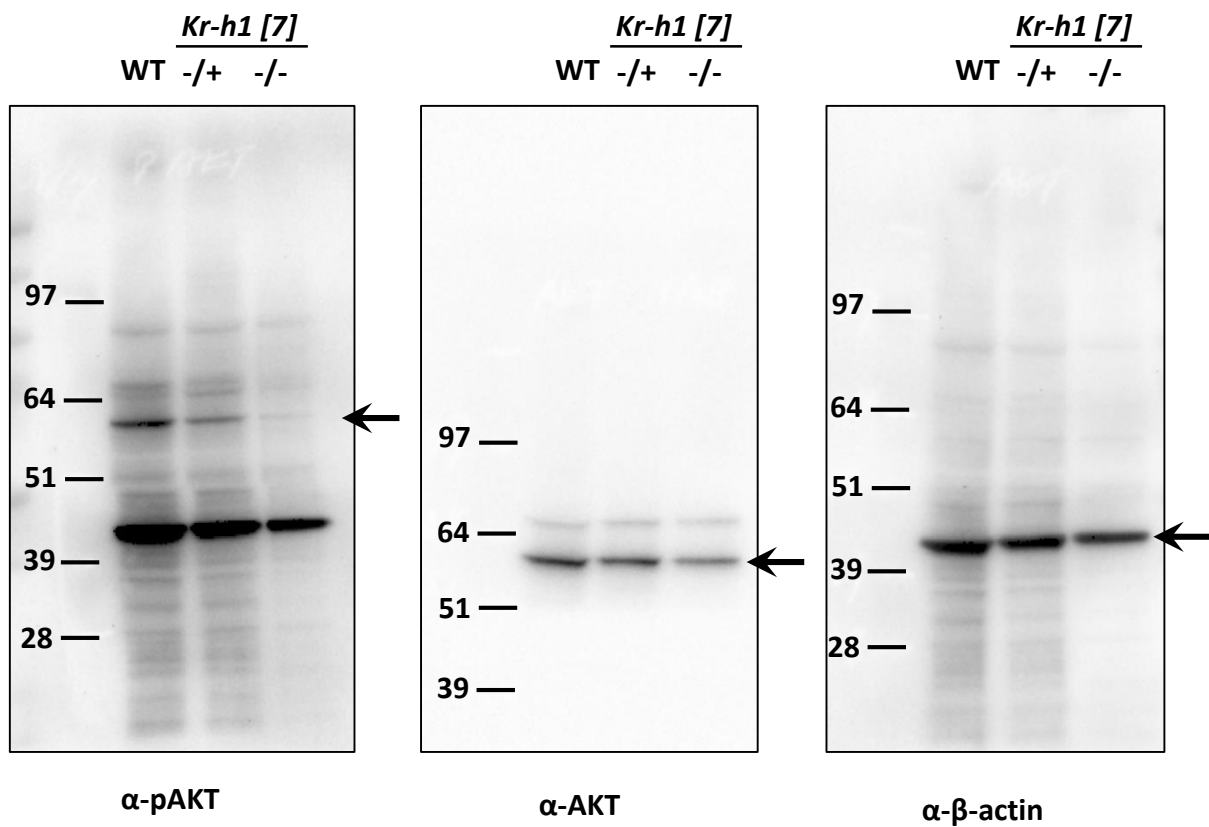

### Supplementary figure S3. Original full-length blots for Figure 3A

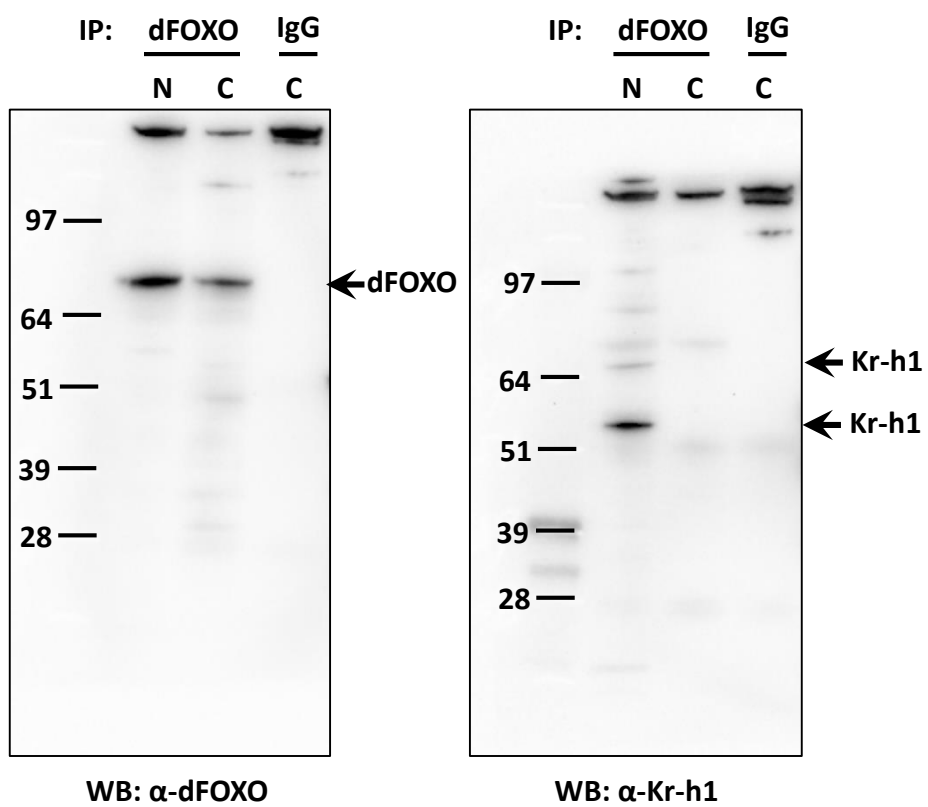

**Supplementary figure S4. Original full-length blots for Figure 3B**

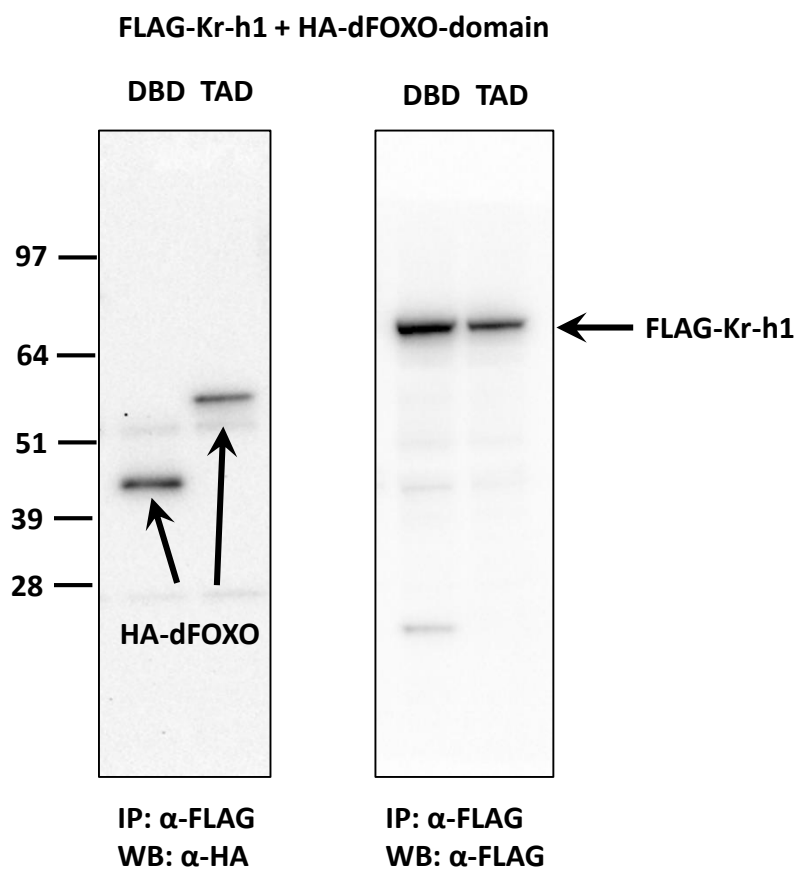

### Supplementary figure S5. Original full-length blots for Figure 3C

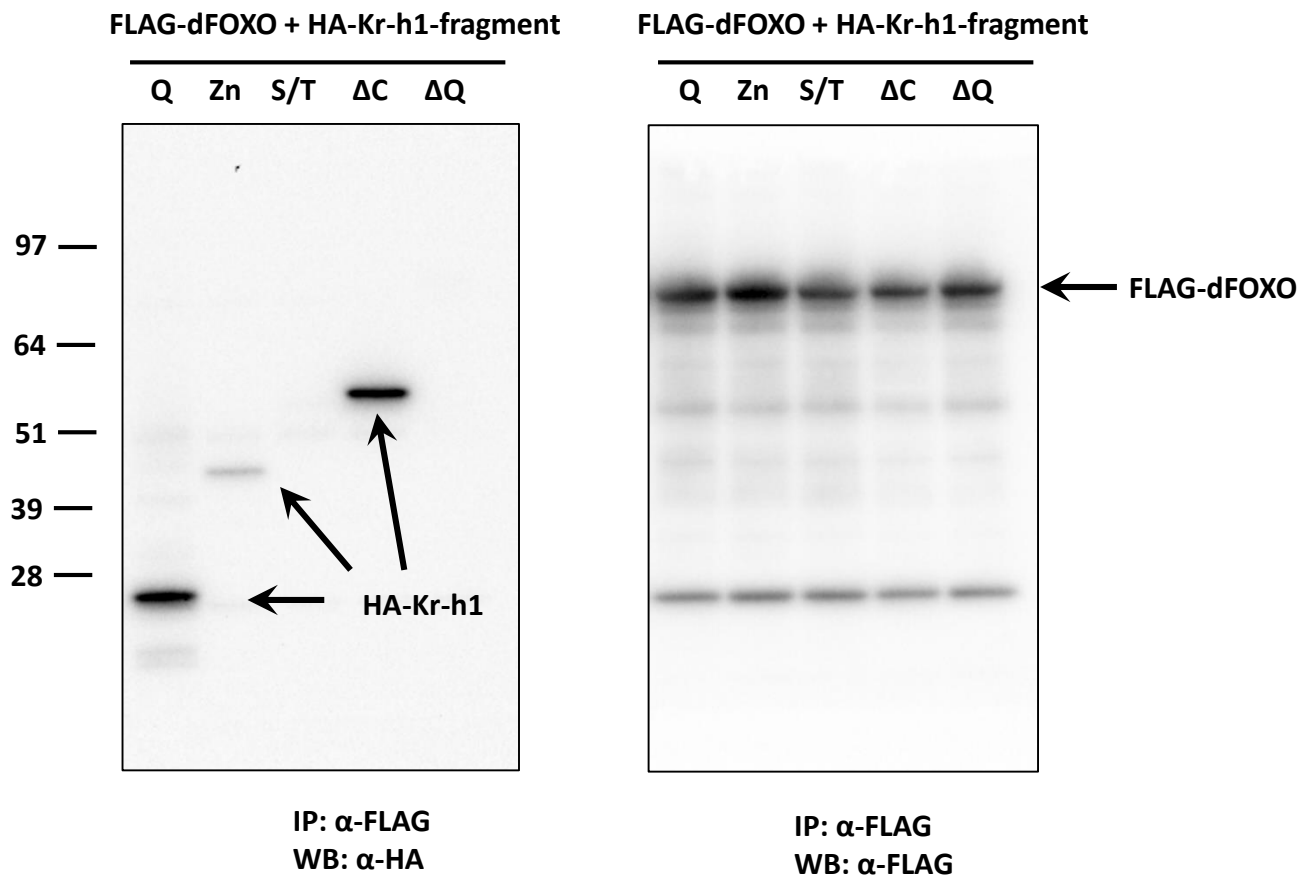

Source: https://www.biorxiv.org/content/10.1101/165456v1.full.pdf
